# Supplementary material for: Temporal and biting dynamics of the chromosomal inversion 2La in the malaria vectors Anopheles gambiae and Anopheles coluzzii in Bangui, Central African Republic
Source: Frontiers journal article supplement (doi:10.3389/fevo.2022.986925), 2022-10-11
Supplement: Table_1.XLSX [file Table_1.XLSX]

## Sheet: Table S1
Month	Year	Temperature (ºC)	Max_temp (ºC)	Min_temp (ºC)	Atmospheric pressure (mbar)	Humidity (%)	Precipitation (mm)
June	2016	25.5	31.1	21.6	1012.2	84.8	337.05
July	2016	25.4	30.5	22.2	1011.5	85.6	262.62
August	2016	25.4	31.6	21.8	1011.4	84	401.58
September	2016	25.4	31.7	21.5	1011.1	82.7	349.5
October	2016	25.8	32.9	21.9	1009.5	82.7	225.05
November	2016	25.8	32.3	21.5	1009.2	82.9	91.18
December	2016	25.7	33	20.6	1009	75.7	76.96
January	2017	26.5	36.8	20.4	1008.4	6.8	8.12
February	2017	28.4	36.3	22	1007.8	57.3	1.53
March	2017	27.9	35.1	22.7	1007.7	71.2	135.64
April	2017	27.1	33.7	22.4	1008.5	78.7	224.03
May	2017	26.5	32.7	22.3	1009.9	81.1	191.78

## Sheet: Table S2
Date (Year - Month)	Site	Location	Species	inv2La
2016-06	Gbanikola	Indoors	An. coluzzii	Standard
2016-06	Gbanikola	Indoors	An. coluzzii	Standard
2016-06	Gbanikola	Indoors	An. gambiae	Standard
2016-06	Gbanikola	Indoors	An. coluzzii	Standard
2016-06	Gbanikola	Indoors	An. coluzzii	Inverted
2016-06	Gbanikola	Indoors	An. coluzzii	Heterozygote
2016-06	Gbanikola	Indoors	An. coluzzii	Standard
2016-06	Gbanikola	Indoors	An. coluzzii	Heterozygote
2016-06	Gbanikola	Indoors	An. coluzzii	Heterozygote
2016-06	Gbanikola	Outdoors	An. coluzzii	Unknown
2016-06	Gbanikola	Outdoors	An. coluzzii	Inverted
2016-06	Gbanikola	Outdoors	An. coluzzii	Heterozygote
2016-06	Gbanikola	Outdoors	An. coluzzii	Inverted
2016-06	Gbanikola	Outdoors	An. coluzzii	Inverted
2016-06	Gbanikola	Outdoors	An. coluzzii	Inverted
2016-06	Gbanikola	Outdoors	An. gambiae	Unknown
2016-06	Gbanikola	Outdoors	An. coluzzii	Heterozygote
2016-06	Gbanikola	Outdoors	An. gambiae	Heterozygote
2016-06	Gbanikola	Outdoors	An. coluzzii	Standard
2016-06	Gbanikola	Outdoors	An. gambiae	Standard
2016-06	Gbanikola	Outdoors	An. gambiae	Inverted
2016-06	Gbanikola	Outdoors	An. gambiae	Standard
2016-06	Gbanikola	Outdoors	An. gambiae	Standard
2016-06	Gbanikola	Outdoors	An. coluzzii	Standard
2016-06	Gbanikola	Outdoors	An. coluzzii	Heterozygote
2016-06	Ile_des_Singes	Indoors	An. gambiae	Inverted
2016-06	Ile_des_Singes	Indoors	An. gambiae	Heterozygote
2016-06	Ile_des_Singes	Indoors	An. gambiae	Standard
2016-06	Ile_des_Singes	Indoors	An. gambiae	Standard
2016-06	Ile_des_Singes	Indoors	An. gambiae	Inverted
2016-06	Ile_des_Singes	Indoors	An. coluzzii	Inverted
2016-06	Ile_des_Singes	Indoors	An. coluzzii	Inverted
2016-06	Ile_des_Singes	Indoors	An. gambiae	Heterozygote
2016-06	Ile_des_Singes	Indoors	An. gambiae	Standard
2016-06	Ile_des_Singes	Indoors	An. coluzzii	Inverted
2016-06	Ile_des_Singes	Indoors	An. gambiae	Standard
2016-06	Ile_des_Singes	Indoors	An. gambiae	Heterozygote
2016-06	Ile_des_Singes	Indoors	An. gambiae	Standard
2016-06	Ile_des_Singes	Indoors	An. gambiae	Inverted
2016-06	Ile_des_Singes	Indoors	An. gambiae	Standard
2016-06	Ile_des_Singes	Indoors	An. gambiae	Heterozygote
2016-06	Ile_des_Singes	Indoors	An. coluzzii	Heterozygote
2016-06	Ile_des_Singes	Indoors	An. gambiae	Standard
2016-06	Gbanikola	Indoors	An. coluzzii	Inverted
2016-06	Gbanikola	Indoors	An. coluzzii	Unknown
2016-06	Gbanikola	Indoors	An. coluzzii	Inverted
2016-06	Gbanikola	Indoors	An. coluzzii	Heterozygote
2016-06	Gbanikola	Indoors	An. coluzzii	Inverted
2016-06	Gbanikola	Indoors	An. coluzzii	Heterozygote
2016-06	Gbanikola	Indoors	An. coluzzii	Inverted
2016-06	Gbanikola	Indoors	An. gambiae	Heterozygote
2016-06	Gbanikola	Outdoors	An. coluzzii	Heterozygote
2016-06	Gbanikola	Outdoors	An. gambiae	Heterozygote
2016-06	Gbanikola	Outdoors	An. gambiae	Heterozygote
2016-06	Gbanikola	Outdoors	An. coluzzii	Inverted
2016-06	Gbanikola	Outdoors	An. coluzzii	Inverted
2016-06	Gbanikola	Outdoors	An. coluzzii	Standard
2016-06	Gbanikola	Outdoors	An. coluzzii	Standard
2016-06	Gbanikola	Outdoors	An. coluzzii	Heterozygote
2016-06	Gbanikola	Outdoors	An. gambiae	Unknown
2016-06	Gbanikola	Outdoors	An. gambiae	Standard
2016-06	Gbanikola	Indoors	An. coluzzii	Heterozygote
2016-06	Gbanikola	Indoors	An. coluzzii	Inverted
2016-06	Gbanikola	Indoors	An. coluzzii	Heterozygote
2016-06	Gbanikola	Indoors	An. coluzzii	Inverted
2016-06	Gbanikola	Indoors	An. coluzzii	Inverted
2016-06	Ile_des_Singes	Indoors	An. coluzzii	Standard
2016-06	Ile_des_Singes	Indoors	An. gambiae	Inverted
2016-06	Ile_des_Singes	Indoors	An. coluzzii	Inverted
2016-06	Ile_des_Singes	Indoors	An. gambiae	Standard
2016-06	Ile_des_Singes	Indoors	An. coluzzii	Heterozygote
2016-06	Ile_des_Singes	Indoors	An. coluzzii	Heterozygote
2016-06	Ile_des_Singes	Indoors	An. coluzzii	Standard
2016-06	Ile_des_Singes	Indoors	An. gambiae	Inverted
2016-06	Ile_des_Singes	Indoors	An. gambiae	Inverted
2016-06	Ile_des_Singes	Indoors	An. coluzzii	Inverted
2016-06	Gbanikola	Indoors	An. gambiae	Standard
2016-06	Gbanikola	Indoors	An. gambiae	Inverted
2016-06	Gbanikola	Indoors	An. gambiae	Inverted
2016-06	Gbanikola	Indoors	An. coluzzii	Inverted
2016-06	Gbanikola	Indoors	An. coluzzii	Inverted
2016-06	Gbanikola	Indoors	An. gambiae	Standard
2016-06	Gbanikola	Indoors	An. gambiae	Heterozygote
2016-06	Gbanikola	Indoors	An. gambiae	Unknown
2016-06	Gbanikola	Indoors	An. gambiae	Heterozygote
2016-06	Gbanikola	Indoors	An. gambiae	Inverted
2016-06	Gbanikola	Indoors	An. gambiae	Heterozygote
2016-06	Gbanikola	Indoors	An. coluzzii	Heterozygote
2016-06	Gbanikola	Indoors	An. gambiae	Standard
2016-06	Gbanikola	Indoors	An. gambiae	Heterozygote
2016-06	Gbanikola	Indoors	An. coluzzii	Heterozygote
2016-06	Gbanikola	Indoors	An. coluzzii	Heterozygote
2016-06	Gbanikola	Indoors	An. gambiae	Heterozygote
2016-06	Gbanikola	Indoors	An. gambiae	Standard
2016-06	Gbanikola	Indoors	An. gambiae	Heterozygote
2016-06	Gbanikola	Indoors	An. gambiae	Heterozygote
2016-06	Gbanikola	Indoors	An. gambiae	Heterozygote
2016-06	Gbanikola	Indoors	An. gambiae	Inverted
2016-06	Gbanikola	Indoors	An. gambiae	Standard
2016-06	Gbanikola	Indoors	An. gambiae	Heterozygote
2016-06	Gbanikola	Indoors	An. gambiae	Unknown
2016-06	Gbanikola	Indoors	An. gambiae	Heterozygote
2016-06	Gbanikola	Indoors	An. gambiae	Standard
2016-06	Gbanikola	Indoors	An. coluzzii	Inverted
2016-06	Gbanikola	Indoors	An. gambiae	Standard
2016-06	Gbanikola	Indoors	An. gambiae	Standard
2016-06	Gbanikola	Indoors	An. coluzzii	Standard
2016-06	Gbanikola	Indoors	An. coluzzii	Inverted
2016-06	Gbanikola	Indoors	An. coluzzii	Heterozygote
2016-06	Gbanikola	Indoors	An. gambiae	Standard
2016-06	Gbanikola	Indoors	An. coluzzii	Standard
2016-06	Gbanikola	Indoors	An. gambiae	Standard
2016-06	Gbanikola	Indoors	An. coluzzii	Heterozygote
2016-06	Gbanikola	Indoors	An. coluzzii	Heterozygote
2016-06	Gbanikola	Indoors	An. coluzzii	Inverted
2016-06	Gbanikola	Indoors	An. coluzzii	Inverted
2016-06	Gbanikola	Indoors	An. coluzzii	Heterozygote
2016-06	Gbanikola	Indoors	An. gambiae	Standard
2016-06	Gbanikola	Indoors	An. coluzzii	Heterozygote
2016-06	Gbanikola	Indoors	An. coluzzii	Standard
2016-06	Gbanikola	Indoors	An. coluzzii	Heterozygote
2016-06	Gbanikola	Indoors	An. coluzzii	Heterozygote
2016-06	Gbanikola	Indoors	An. coluzzii	Heterozygote
2016-06	Gbanikola	Indoors	An. coluzzii	Heterozygote
2016-06	Gbanikola	Indoors	An. coluzzii	Inverted
2016-06	Gbanikola	Indoors	An. coluzzii	Standard
2016-06	Gbanikola	Indoors	An. gambiae	Standard
2016-06	Gbanikola	Indoors	An. coluzzii	Standard
2016-06	Gbanikola	Indoors	An. gambiae	Heterozygote
2016-06	Gbanikola	Indoors	An. coluzzii	Inverted
2016-06	Gbanikola	Indoors	An. coluzzii	Heterozygote
2016-06	Gbanikola	Indoors	An. gambiae	Inverted
2016-06	Gbanikola	Indoors	An. coluzzii	Heterozygote
2016-06	Gbanikola	Indoors	An. gambiae	Heterozygote
2016-06	Gbanikola	Indoors	An. coluzzii	Standard
2016-06	Gbanikola	Indoors	An. gambiae	Standard
2016-06	Gbanikola	Outdoors	An. gambiae	Heterozygote
2016-06	Gbanikola	Outdoors	An. gambiae	Standard
2016-06	Gbanikola	Outdoors	An. coluzzii	Heterozygote
2016-06	Gbanikola	Outdoors	An. coluzzii	Heterozygote
2016-06	Gbanikola	Outdoors	An. gambiae	Standard
2016-06	Gbanikola	Outdoors	An. coluzzii	Heterozygote
2016-06	Gbanikola	Outdoors	An. coluzzii	Heterozygote
2016-06	Gbanikola	Outdoors	An. gambiae	Heterozygote
2016-06	Gbanikola	Outdoors	An. gambiae	Inverted
2016-06	Gbanikola	Outdoors	An. coluzzii	Inverted
2016-06	Gbanikola	Outdoors	An. coluzzii	Heterozygote
2016-06	Gbanikola	Outdoors	An. gambiae	Standard
2016-06	Gbanikola	Outdoors	An. coluzzii	Heterozygote
2016-06	Gbanikola	Outdoors	An. coluzzii	Heterozygote
2016-06	Gbanikola	Outdoors	An. gambiae	Inverted
2016-06	Gbanikola	Outdoors	An. gambiae	Standard
2016-06	Gbanikola	Outdoors	An. coluzzii	Heterozygote
2016-06	Gbanikola	Outdoors	An. gambiae	Inverted
2016-06	Gbanikola	Outdoors	An. coluzzii	Inverted
2016-06	Gbanikola	Outdoors	An. gambiae	Inverted
2016-06	Gbanikola	Outdoors	An. coluzzii	Heterozygote
2016-06	Gbanikola	Outdoors	An. gambiae	Standard
2016-06	Gbanikola	Outdoors	An. coluzzii	Inverted
2016-06	Gbanikola	Outdoors	An. coluzzii	Heterozygote
2016-06	Gbanikola	Outdoors	An. coluzzii	Heterozygote
2016-06	Gbanikola	Outdoors	An. coluzzii X gambiae	Unknown
2016-06	Gbanikola	Outdoors	An. coluzzii	Heterozygote
2016-06	Ile_des_Singes	Outdoors	An. coluzzii	Inverted
2016-06	Ile_des_Singes	Outdoors	An. coluzzii	Inverted
2016-06	Ile_des_Singes	Outdoors	An. gambiae	Unknown
2016-06	Ile_des_Singes	Outdoors	An. gambiae	Heterozygote
2016-06	Gbanikola	Indoors	An. gambiae	Standard
2016-06	Gbanikola	Indoors	An. coluzzii	Heterozygote
2016-06	Gbanikola	Indoors	An. gambiae	Standard
2016-06	Gbanikola	Indoors	An. gambiae	Standard
2016-06	Gbanikola	Indoors	An. coluzzii	Standard
2016-06	Gbanikola	Indoors	An. gambiae	Standard
2016-06	Gbanikola	Indoors	An. gambiae	Heterozygote
2016-06	Gbanikola	Indoors	An. coluzzii	Inverted
2016-06	Gbanikola	Indoors	An. coluzzii	Standard
2016-06	Gbanikola	Indoors	An. coluzzii	Heterozygote
2016-06	Gbanikola	Indoors	An. coluzzii	Inverted
2016-06	Gbanikola	Indoors	An. gambiae	Standard
2016-06	Gbanikola	Indoors	An. gambiae	Standard
2016-06	Gbanikola	Indoors	An. coluzzii	Inverted
2016-06	Gbanikola	Indoors	An. coluzzii	Heterozygote
2016-06	Gbanikola	Outdoors	An. coluzzii	Inverted
2016-06	Gbanikola	Outdoors	An. coluzzii	Inverted
2016-06	Gbanikola	Outdoors	An. coluzzii	Inverted
2016-06	Gbanikola	Outdoors	An. gambiae	Standard
2016-06	Gbanikola	Outdoors	An. coluzzii	Heterozygote
2016-06	Gbanikola	Outdoors	An. coluzzii	Heterozygote
2016-06	Gbanikola	Outdoors	An. coluzzii	Heterozygote
2016-06	Gbanikola	Outdoors	An. coluzzii	Inverted
2016-06	PK10	Outdoors	An. gambiae	Heterozygote
2016-06	PK10	Outdoors	An. gambiae	Standard
2016-06	PK10	Outdoors	An. gambiae	Inverted
2016-06	PK10	Outdoors	An. gambiae	Heterozygote
2016-06	PK10	Outdoors	An. gambiae	Inverted
2016-06	PK10	Outdoors	An. gambiae	Standard
2016-06	PK10	Outdoors	An. gambiae	Heterozygote
2016-06	PK10	Outdoors	An. gambiae	Heterozygote
2016-06	PK10	Outdoors	An. gambiae	Standard
2016-06	PK10	Outdoors	An. gambiae	Inverted
2016-06	PK10	Outdoors	An. gambiae	Heterozygote
2016-06	PK10	Outdoors	An. gambiae	Heterozygote
2016-06	PK10	Outdoors	An. gambiae	Inverted
2016-06	PK10	Outdoors	An. coluzzii	Inverted
2016-06	PK10	Outdoors	An. gambiae	Inverted
2016-06	PK10	Outdoors	An. gambiae	Inverted
2016-06	PK10	Outdoors	An. gambiae	Heterozygote
2016-06	PK10	Indoors	An. gambiae	Standard
2016-06	PK10	Indoors	An. gambiae	Heterozygote
2016-06	PK10	Indoors	An. gambiae	Inverted
2016-06	PK10	Indoors	An. gambiae	Heterozygote
2016-06	PK10	Indoors	An. gambiae	Standard
2016-06	PK10	Indoors	An. gambiae	Heterozygote
2016-06	PK10	Indoors	An. gambiae	Heterozygote
2016-06	PK10	Indoors	An. gambiae	Standard
2016-06	PK10	Indoors	An. gambiae	Standard
2016-06	PK10	Indoors	An. gambiae	Heterozygote
2016-06	PK10	Indoors	An. gambiae	Inverted
2016-06	PK10	Indoors	An. gambiae	Heterozygote
2016-06	PK10	Indoors	An. coluzzii	Inverted
2016-06	PK10	Indoors	An. coluzzii	Heterozygote
2016-06	PK10	Indoors	An. gambiae	Heterozygote
2016-06	PK10	Indoors	An. gambiae	Standard
2016-06	PK10	Indoors	An. gambiae	Inverted
2016-06	PK10	Indoors	An. gambiae	Heterozygote
2016-06	PK10	Indoors	An. gambiae	Heterozygote
2016-06	PK10	Indoors	An. gambiae	Standard
2016-06	PK10	Indoors	An. gambiae	Standard
2016-06	PK10	Indoors	An. gambiae	Heterozygote
2016-06	Ouango	Indoors	An. coluzzii	Heterozygote
2016-06	Ouango	Indoors	An. gambiae	Heterozygote
2016-06	Ouango	Indoors	An. gambiae	Unknown
2016-06	Ouango	Indoors	An. coluzzii	Inverted
2016-06	Ouango	Indoors	An. coluzzii	Inverted
2016-06	Ouango	Indoors	An. gambiae	Heterozygote
2016-06	Ouango	Indoors	An. gambiae	Inverted
2016-06	Ouango	Indoors	An. coluzzii	Heterozygote
2016-06	Ouango	Indoors	An. gambiae	Standard
2016-06	Ouango	Indoors	An. gambiae	Inverted
2016-06	Ouango	Indoors	An. gambiae	Heterozygote
2016-06	Ouango	Indoors	An. coluzzii	Standard
2016-06	Ouango	Indoors	An. gambiae	Unknown
2016-06	Ouango	Indoors	An. gambiae	Unknown
2016-06	Ouango	Indoors	An. coluzzii	Inverted
2016-06	Ouango	Indoors	An. coluzzii	Standard
2016-06	Ouango	Indoors	An. gambiae	Heterozygote
2016-06	Ouango	Indoors	An. gambiae	Standard
2016-06	Ouango	Indoors	An. gambiae	Heterozygote
2016-06	Ouango	Indoors	An. gambiae	Heterozygote
2016-06	Ouango	Indoors	An. gambiae	Standard
2016-06	Ouango	Indoors	An. gambiae	Standard
2016-06	Ouango	Indoors	An. coluzzii	Heterozygote
2016-06	Ouango	Indoors	An. coluzzii	Heterozygote
2016-06	Ouango	Indoors	An. gambiae	Unknown
2016-06	Ouango	Indoors	An. gambiae	Standard
2016-06	Ouango	Indoors	An. gambiae	Standard
2016-06	Ouango	Indoors	An. gambiae	Inverted
2016-06	Ouango	Indoors	An. gambiae	Heterozygote
2016-06	Ouango	Indoors	An. coluzzii	Heterozygote
2016-06	Ouango	Indoors	An. gambiae	Heterozygote
2016-06	Ouango	Indoors	An. gambiae	Heterozygote
2016-06	Ouango	Indoors	An. gambiae	Heterozygote
2016-06	Ouango	Indoors	An. coluzzii	Heterozygote
2016-06	Ouango	Indoors	An. gambiae	Heterozygote
2016-06	Ouango	Indoors	An. gambiae	Standard
2016-06	Ouango	Indoors	An. gambiae	Inverted
2016-06	Ouango	Indoors	An. gambiae	Heterozygote
2016-06	Ouango	Indoors	An. gambiae	Inverted
2016-06	Ouango	Indoors	An. gambiae	Heterozygote
2016-06	Ouango	Indoors	An. gambiae	Standard
2016-06	Ouango	Indoors	An. coluzzii	Inverted
2016-06	Ouango	Indoors	An. gambiae	Standard
2016-06	Ouango	Indoors	An. coluzzii	Standard
2016-06	Ouango	Indoors	An. gambiae	Standard
2016-06	Ouango	Indoors	An. gambiae	Standard
2016-06	Ouango	Indoors	An. gambiae	Heterozygote
2016-06	Ouango	Indoors	An. gambiae	Standard
2016-06	Ouango	Indoors	An. gambiae	Heterozygote
2016-06	Ouango	Indoors	An. gambiae	Inverted
2016-06	Ouango	Indoors	An. gambiae	Heterozygote
2016-06	Ouango	Indoors	An. gambiae	Heterozygote
2016-06	Ouango	Indoors	An. gambiae	Heterozygote
2016-06	Ouango	Indoors	An. gambiae	Heterozygote
2016-06	Ouango	Indoors	An. gambiae	Unknown
2016-06	Ouango	Indoors	An. gambiae	Inverted
2016-06	Ouango	Indoors	An. gambiae	Standard
2016-06	Ouango	Indoors	An. gambiae	Heterozygote
2016-06	Ouango	Indoors	An. gambiae	Heterozygote
2016-06	Ouango	Indoors	An. gambiae	Standard
2016-06	Ouango	Outdoors	An. gambiae	Standard
2016-06	Ouango	Outdoors	An. gambiae	Standard
2016-06	Ouango	Outdoors	An. gambiae	Inverted
2016-06	Ouango	Outdoors	An. coluzzii	Standard
2016-06	Ouango	Outdoors	An. gambiae	Inverted
2016-06	Ouango	Outdoors	An. gambiae	Standard
2016-06	Ouango	Outdoors	An. gambiae	Standard
2016-06	Ouango	Outdoors	An. gambiae	Standard
2016-06	Ouango	Outdoors	An. gambiae	Standard
2016-06	Ouango	Outdoors	An. gambiae	Standard
2016-06	Ouango	Outdoors	An. gambiae	Standard
2016-06	Ouango	Outdoors	An. gambiae	Heterozygote
2016-06	Ouango	Outdoors	An. gambiae	Heterozygote
2016-06	Ouango	Outdoors	An. gambiae	Standard
2016-06	Ouango	Outdoors	An. gambiae	Heterozygote
2016-06	Ouango	Outdoors	An. gambiae	Heterozygote
2016-06	Ouango	Outdoors	An. gambiae	Standard
2016-06	Ouango	Outdoors	An. gambiae	Heterozygote
2016-06	Ouango	Outdoors	An. gambiae	Standard
2016-06	Ouango	Outdoors	An. gambiae	Heterozygote
2016-06	Ouango	Outdoors	An. gambiae	Heterozygote
2016-06	Ouango	Outdoors	An. coluzzii	Inverted
2016-06	Ouango	Outdoors	An. gambiae	Heterozygote
2016-06	Ouango	Outdoors	An. gambiae	Inverted
2016-06	Ouango	Outdoors	An. gambiae	Inverted
2016-06	Ouango	Outdoors	An. gambiae	Heterozygote
2016-06	Ouango	Outdoors	An. gambiae	Standard
2016-06	Ouango	Outdoors	An. gambiae	Heterozygote
2016-06	Ouango	Outdoors	An. gambiae	Heterozygote
2016-06	Ouango	Outdoors	An. coluzzii	Heterozygote
2016-06	Ouango	Outdoors	An. gambiae	Inverted
2016-06	Ouango	Outdoors	An. gambiae	Heterozygote
2016-06	Ouango	Outdoors	An. gambiae	Standard
2016-06	Ouango	Outdoors	An. gambiae	Heterozygote
2016-06	Ouango	Outdoors	An. gambiae	Standard
2016-06	Ouango	Outdoors	An. gambiae	Standard
2016-06	Ouango	Outdoors	An. coluzzii	Heterozygote
2016-06	Ouango	Outdoors	An. gambiae	Inverted
2016-06	Ouango	Outdoors	An. gambiae	Standard
2016-06	Ouango	Outdoors	An. gambiae	Heterozygote
2016-06	Ouango	Outdoors	An. gambiae	Standard
2016-06	Ouango	Outdoors	An. gambiae	Standard
2016-06	Ouango	Outdoors	An. gambiae	Heterozygote
2016-06	Ouango	Outdoors	An. gambiae	Heterozygote
2016-06	Ouango	Outdoors	An. gambiae	Heterozygote
2016-06	Ouango	Outdoors	An. coluzzii	Inverted
2016-06	Ouango	Outdoors	An. gambiae	Inverted
2016-06	Ouango	Outdoors	An. coluzzii	Heterozygote
2016-06	Ouango	Outdoors	An. gambiae	Inverted
2016-06	Ouango	Outdoors	An. gambiae	Heterozygote
2016-06	Ouango	Outdoors	An. coluzzii	Standard
2016-06	Ouango	Outdoors	An. gambiae	Standard
2016-06	Ouango	Outdoors	An. gambiae	Standard
2016-06	Ouango	Outdoors	An. gambiae	Inverted
2016-06	Ouango	Outdoors	An. gambiae	Inverted
2016-06	Ouango	Outdoors	An. gambiae	Standard
2016-06	Ouango	Outdoors	An. gambiae	Heterozygote
2016-06	Ouango	Outdoors	An. gambiae	Standard
2016-06	Ouango	Outdoors	An. gambiae	Heterozygote
2016-06	Ouango	Outdoors	An. gambiae	Standard
2016-06	Ouango	Outdoors	An. gambiae	Heterozygote
2016-06	Ouango	Outdoors	An. gambiae	Inverted
2016-06	Ouango	Outdoors	An. gambiae	Heterozygote
2016-06	Ouango	Outdoors	An. gambiae	Standard
2016-06	Ouango	Outdoors	An. gambiae	Standard
2016-06	Ouango	Outdoors	An. gambiae	Standard
2016-06	Ouango	Outdoors	An. gambiae	Heterozygote
2016-06	Ouango	Outdoors	An. coluzzii	Standard
2016-06	Ouango	Outdoors	An. gambiae	Standard
2016-06	Ouango	Outdoors	An. gambiae	Standard
2016-06	Ouango	Outdoors	An. gambiae	Standard
2016-06	Ouango	Outdoors	An. gambiae	Inverted
2016-06	Ouango	Outdoors	An. gambiae	Heterozygote
2016-06	Ouango	Outdoors	An. gambiae	Heterozygote
2016-06	Ouango	Outdoors	An. gambiae	Inverted
2016-06	Ouango	Outdoors	An. gambiae	Inverted
2016-06	Ouango	Outdoors	An. gambiae	Standard
2016-06	Ouango	Outdoors	An. gambiae	Inverted
2016-06	Ouango	Outdoors	An. coluzzii	Inverted
2016-06	Ouango	Outdoors	An. coluzzii	Standard
2016-06	Ouango	Outdoors	An. coluzzii	Inverted
2016-06	Ouango	Outdoors	An. gambiae	Heterozygote
2016-06	Ouango	Outdoors	An. gambiae	Standard
2016-06	Ouango	Outdoors	An. coluzzii	Heterozygote
2016-06	Ouango	Outdoors	An. coluzzii	Standard
2016-06	Ouango	Outdoors	An. gambiae	Inverted
2016-06	Ouango	Outdoors	An. gambiae	Inverted
2016-06	Ouango	Outdoors	An. gambiae	Heterozygote
2016-06	Ouango	Outdoors	An. gambiae	Inverted
2016-06	Ouango	Outdoors	An. gambiae	Heterozygote
2016-06	Ouango	Outdoors	An. coluzzii	Standard
2016-06	Ouango	Outdoors	An. gambiae	Heterozygote
2016-06	Ouango	Outdoors	An. gambiae	Inverted
2016-06	Ouango	Outdoors	An. gambiae	Heterozygote
2016-06	Ouango	Outdoors	An. gambiae	Standard
2016-06	Ouango	Outdoors	An. coluzzii	Heterozygote
2016-06	Ouango	Outdoors	An. gambiae	Heterozygote
2016-06	Ouango	Outdoors	An. gambiae	Heterozygote
2016-06	Ouango	Outdoors	An. gambiae	Heterozygote
2016-06	Ouango	Outdoors	An. coluzzii	Inverted
2016-06	Ouango	Outdoors	An. gambiae	Heterozygote
2016-06	Ouango	Outdoors	An. gambiae	Heterozygote
2016-06	Ouango	Outdoors	An. gambiae	Heterozygote
2016-06	Ouango	Outdoors	An. gambiae	Heterozygote
2016-06	Ouango	Outdoors	An. gambiae	Heterozygote
2016-06	Ouango	Outdoors	An. gambiae	Heterozygote
2016-06	Ouango	Outdoors	An. gambiae	Inverted
2016-06	Ouango	Outdoors	An. coluzzii	Heterozygote
2016-06	Ouango	Outdoors	An. gambiae	Heterozygote
2016-06	Ouango	Outdoors	An. gambiae	Heterozygote
2016-06	Ouango	Outdoors	An. gambiae	Standard
2016-06	Ouango	Outdoors	An. gambiae	Inverted
2016-06	Ouango	Outdoors	An. gambiae	Heterozygote
2016-06	Ouango	Outdoors	An. coluzzii	Heterozygote
2016-06	Ouango	Outdoors	An. gambiae	Inverted
2016-06	Ouango	Outdoors	An. gambiae	Heterozygote
2016-06	Ouango	Outdoors	An. gambiae	Heterozygote
2016-06	Ouango	Indoors	An. gambiae	Heterozygote
2016-06	Ouango	Indoors	An. gambiae	Standard
2016-06	Ouango	Indoors	An. gambiae	Standard
2016-06	Ouango	Indoors	An. coluzzii	Standard
2016-06	Ouango	Indoors	An. gambiae	Standard
2016-06	Ouango	Indoors	An. gambiae	Inverted
2016-06	Ouango	Indoors	An. gambiae	Inverted
2016-06	Ouango	Indoors	An. gambiae	Heterozygote
2016-06	Ouango	Indoors	An. gambiae	Standard
2016-06	Ouango	Indoors	An. gambiae	Standard
2016-06	Ouango	Indoors	An. gambiae	Heterozygote
2016-06	Ouango	Indoors	An. gambiae	Heterozygote
2016-06	Ouango	Indoors	An. gambiae	Inverted
2016-06	Ouango	Indoors	An. gambiae	Heterozygote
2016-06	Ouango	Indoors	An. gambiae	Standard
2016-06	Ouango	Indoors	An. coluzzii	Inverted
2016-06	Ouango	Indoors	An. coluzzii	Inverted
2016-06	Ouango	Indoors	An. gambiae	Standard
2016-06	Ouango	Indoors	An. coluzzii	Inverted
2016-06	Ouango	Indoors	An. gambiae	Heterozygote
2016-06	Ouango	Indoors	An. gambiae	Inverted
2016-06	Ouango	Indoors	An. gambiae	Standard
2016-06	Ouango	Indoors	An. gambiae	Heterozygote
2016-06	Ouango	Indoors	An. coluzzii	Heterozygote
2016-06	Ouango	Indoors	An. coluzzii	Inverted
2016-06	Ouango	Indoors	An. coluzzii	Inverted
2016-06	Ouango	Indoors	An. gambiae	Heterozygote
2016-06	Ouango	Indoors	An. coluzzii	Heterozygote
2016-06	Ouango	Indoors	An. gambiae	Heterozygote
2016-06	Ouango	Indoors	An. gambiae	Standard
2016-06	Ouango	Indoors	An. coluzzii	Inverted
2016-06	Ouango	Indoors	An. gambiae	Heterozygote
2016-06	Ouango	Indoors	An. gambiae	Heterozygote
2016-06	Ouango	Indoors	An. coluzzii	Heterozygote
2016-06	Ouango	Indoors	An. coluzzii	Inverted
2016-06	Ouango	Indoors	An. gambiae	Inverted
2016-06	Ouango	Indoors	An. coluzzii	Heterozygote
2016-06	Ouango	Indoors	An. coluzzii	Standard
2016-06	Ouango	Indoors	An. coluzzii	Heterozygote
2016-06	Ouango	Indoors	An. gambiae	Standard
2016-06	Ouango	Indoors	An. gambiae	Standard
2016-06	Ouango	Indoors	An. gambiae	Heterozygote
2016-06	Ouango	Indoors	An. gambiae	Inverted
2016-06	Ouango	Indoors	An. coluzzii	Standard
2016-06	Ouango	Indoors	An. coluzzii	Standard
2016-06	Ouango	Indoors	An. gambiae	Heterozygote
2016-06	Ouango	Indoors	An. gambiae	Standard
2016-06	Ouango	Indoors	An. gambiae	Standard
2016-06	Ouango	Indoors	An. gambiae	Heterozygote
2016-06	Ouango	Indoors	An. gambiae	Standard
2016-06	Ouango	Indoors	An. gambiae	Standard
2016-06	Ouango	Indoors	An. gambiae	Standard
2016-06	Ouango	Indoors	An. gambiae	Standard
2016-06	Ouango	Indoors	An. gambiae	Unknown
2016-06	Ouango	Indoors	An. gambiae	Heterozygote
2016-06	Ouango	Indoors	An. gambiae	Inverted
2016-06	Ouango	Indoors	An. coluzzii	Standard
2016-06	Ouango	Indoors	An. gambiae	Inverted
2016-06	Ouango	Indoors	An. gambiae	Standard
2016-06	Ouango	Indoors	An. gambiae	Unknown
2016-06	Ouango	Indoors	An. coluzzii	Standard
2016-06	Ouango	Outdoors	An. gambiae	Standard
2016-06	Ouango	Outdoors	An. coluzzii	Heterozygote
2016-06	PK10	Indoors	An. gambiae	Heterozygote
2016-06	PK10	Indoors	An. gambiae	Standard
2016-06	PK10	Indoors	An. gambiae	Heterozygote
2016-06	PK10	Indoors	An. gambiae	Heterozygote
2016-06	PK10	Indoors	An. gambiae	Heterozygote
2016-06	PK10	Outdoors	An. gambiae	Heterozygote
2016-06	PK10	Outdoors	An. gambiae	Heterozygote
2016-06	PK10	Outdoors	An. gambiae	Heterozygote
2016-06	PK10	Outdoors	An. gambiae	Standard
2016-06	PK10	Outdoors	An. gambiae	Inverted
2016-06	PK10	Outdoors	An. gambiae	Standard
2016-06	PK10	Outdoors	An. gambiae	Inverted
2016-06	PK10	Outdoors	An. gambiae	Standard
2016-06	PK10	Outdoors	An. gambiae	Inverted
2016-06	PK10	Outdoors	An. gambiae	Standard
2016-06	PK10	Outdoors	An. gambiae	Heterozygote
2016-06	PK10	Outdoors	An. gambiae	Standard
2016-06	PK10	Outdoors	An. gambiae	Inverted
2016-06	PK10	Indoors	An. gambiae	Heterozygote
2016-06	PK10	Indoors	An. gambiae	Standard
2016-06	PK10	Indoors	An. gambiae	Heterozygote
2016-06	PK10	Indoors	An. gambiae	Inverted
2016-06	PK10	Outdoors	An. gambiae	Heterozygote
2016-06	PK10	Outdoors	An. gambiae	Standard
2016-06	PK10	Outdoors	An. gambiae	Standard
2016-06	Ouango	Outdoors	An. gambiae	Standard
2016-06	Ouango	Indoors	An. coluzzii	Heterozygote
2016-06	Ouango	Indoors	An. gambiae	Inverted
2016-06	Ouango	Indoors	An. gambiae	Heterozygote
2016-06	Ouango	Indoors	An. gambiae	Heterozygote
2016-06	Ouango	Indoors	An. gambiae	Inverted
2016-06	Ouango	Indoors	An. gambiae	Inverted
2016-06	Ouango	Indoors	An. gambiae	Heterozygote
2016-06	Ouango	Indoors	An. gambiae	Standard
2016-06	Ouango	Indoors	An. gambiae	Standard
2016-06	Ouango	Indoors	An. gambiae	Standard
2016-06	Ouango	Indoors	An. coluzzii	Inverted
2016-06	Ouango	Indoors	An. gambiae	Standard
2016-06	Ouango	Indoors	An. gambiae	Standard
2016-07	Gbanikola	Outdoors	An. coluzzii	Standard
2016-07	Gbanikola	Outdoors	An. gambiae	Inverted
2016-07	Gbanikola	Outdoors	An. gambiae	Standard
2016-07	Gbanikola	Outdoors	An. gambiae	Standard
2016-07	Gbanikola	Outdoors	An. coluzzii	Inverted
2016-07	Gbanikola	Outdoors	An. gambiae	Standard
2016-07	Gbanikola	Outdoors	An. gambiae	Inverted
2016-07	Gbanikola	Outdoors	An. gambiae	Inverted
2016-07	Gbanikola	Outdoors	An. coluzzii	Standard
2016-07	Gbanikola	Outdoors	An. gambiae	Inverted
2016-07	Gbanikola	Outdoors	An. coluzzii	Inverted
2016-07	Gbanikola	Outdoors	An. gambiae	Heterozygote
2016-07	Gbanikola	Outdoors	An. gambiae	Inverted
2016-07	Gbanikola	Outdoors	An. gambiae	Standard
2016-07	Gbanikola	Outdoors	An. gambiae	Inverted
2016-07	Gbanikola	Outdoors	An. coluzzii	Standard
2016-07	Gbanikola	Outdoors	An. coluzzii	Standard
2016-07	Gbanikola	Outdoors	An. gambiae	Standard
2016-07	Gbanikola	Outdoors	An. coluzzii	Standard
2016-07	Gbanikola	Outdoors	An. coluzzii	Standard
2016-07	Gbanikola	Outdoors	An. gambiae	Inverted
2016-07	Gbanikola	Outdoors	An. gambiae	Heterozygote
2016-07	Gbanikola	Indoors	An. gambiae	Heterozygote
2016-07	Gbanikola	Indoors	An. gambiae	Standard
2016-07	Gbanikola	Indoors	An. gambiae	Standard
2016-07	Gbanikola	Indoors	An. gambiae	Standard
2016-07	Gbanikola	Indoors	An. gambiae	Standard
2016-07	Gbanikola	Indoors	An. coluzzii	Inverted
2016-07	Gbanikola	Indoors	An. gambiae	Inverted
2016-07	Gbanikola	Indoors	An. coluzzii	Heterozygote
2016-07	Gbanikola	Indoors	An. coluzzii	Heterozygote
2016-07	Gbanikola	Indoors	An. gambiae	Heterozygote
2016-07	Gbanikola	Indoors	An. gambiae	Inverted
2016-07	Gbanikola	Indoors	An. gambiae	Heterozygote
2016-07	Gbanikola	Indoors	An. gambiae	Inverted
2016-07	Ile_des_Singes	Indoors	An. coluzzii	Inverted
2016-07	Ile_des_Singes	Indoors	An. coluzzii	Heterozygote
2016-07	Ile_des_Singes	Indoors	An. gambiae	Heterozygote
2016-07	Ile_des_Singes	Indoors	An. coluzzii	Heterozygote
2016-07	Ile_des_Singes	Indoors	An. coluzzii	Standard
2016-07	Ile_des_Singes	Indoors	An. gambiae	Standard
2016-07	Ile_des_Singes	Indoors	An. coluzzii	Standard
2016-07	Ile_des_Singes	Indoors	An. coluzzii	Heterozygote
2016-07	Ile_des_Singes	Outdoors	An. gambiae	Inverted
2016-07	Ile_des_Singes	Indoors	An. coluzzii	Standard
2016-07	Gbanikola	Indoors	An. gambiae	Heterozygote
2016-07	Gbanikola	Indoors	An. gambiae	Standard
2016-07	Gbanikola	Indoors	An. gambiae	Standard
2016-07	Gbanikola	Indoors	An. coluzzii	Inverted
2016-07	Gbanikola	Indoors	An. coluzzii	Heterozygote
2016-07	Gbanikola	Indoors	An. coluzzii	Inverted
2016-07	Gbanikola	Outdoors	An. gambiae	Standard
2016-07	Gbanikola	Outdoors	An. coluzzii	Standard
2016-07	Gbanikola	Outdoors	An. gambiae	Inverted
2016-07	Gbanikola	Outdoors	An. gambiae	Unknown
2016-07	Gbanikola	Outdoors	An. gambiae	Standard
2016-07	Gbanikola	Outdoors	An. gambiae	Standard
2016-07	Gbanikola	Outdoors	An. coluzzii X gambiae	Standard
2016-07	Gbanikola	Outdoors	An. coluzzii	Standard
2016-07	Gbanikola	Outdoors	An. coluzzii	Standard
2016-07	Gbanikola	Outdoors	An. coluzzii	Inverted
2016-07	Gbanikola	Outdoors	An. coluzzii	Heterozygote
2016-07	Gbanikola	Outdoors	An. coluzzii	Heterozygote
2016-07	Gbanikola	Outdoors	An. coluzzii	Inverted
2016-07	Gbanikola	Outdoors	An. gambiae	Inverted
2016-07	Gbanikola	Outdoors	An. gambiae	Heterozygote
2016-07	Gbanikola	Outdoors	An. gambiae	Standard
2016-07	Gbanikola	Outdoors	An. gambiae	Heterozygote
2016-07	Gbanikola	Outdoors	An. coluzzii	Inverted
2016-07	Gbanikola	Outdoors	An. coluzzii	Inverted
2016-07	Gbanikola	Indoors	An. gambiae	Inverted
2016-07	Gbanikola	Indoors	An. coluzzii	Heterozygote
2016-07	Gbanikola	Indoors	An. gambiae	Inverted
2016-07	Gbanikola	Indoors	An. gambiae	Inverted
2016-07	Gbanikola	Indoors	An. gambiae	Heterozygote
2016-07	Gbanikola	Indoors	An. gambiae	Inverted
2016-07	Gbanikola	Indoors	An. coluzzii	Heterozygote
2016-07	Gbanikola	Indoors	An. coluzzii	Standard
2016-07	Gbanikola	Indoors	An. coluzzii	Heterozygote
2016-07	Gbanikola	Indoors	An. gambiae	Inverted
2016-07	Gbanikola	Indoors	An. gambiae	Heterozygote
2016-07	Gbanikola	Indoors	An. gambiae	Heterozygote
2016-07	Gbanikola	Indoors	An. coluzzii	Heterozygote
2016-07	Gbanikola	Indoors	An. coluzzii	Heterozygote
2016-07	Gbanikola	Indoors	An. coluzzii	Inverted
2016-07	Gbanikola	Indoors	An. coluzzii	Heterozygote
2016-07	Ile_des_Singes	Indoors	An. gambiae	Standard
2016-07	Ile_des_Singes	Indoors	An. coluzzii	Heterozygote
2016-07	Ile_des_Singes	Indoors	An. coluzzii	Heterozygote
2016-07	Ile_des_Singes	Indoors	An. coluzzii	Heterozygote
2016-07	Ile_des_Singes	Indoors	An. coluzzii	Heterozygote
2016-07	Ile_des_Singes	Indoors	An. coluzzii	Heterozygote
2016-07	Ile_des_Singes	Indoors	An. coluzzii	Inverted
2016-07	Ile_des_Singes	Indoors	An. gambiae	Inverted
2016-07	Ile_des_Singes	Outdoors	An. coluzzii	Inverted
2016-07	Gbanikola	Outdoors	An. coluzzii	Standard
2016-07	Gbanikola	Outdoors	An. gambiae	Inverted
2016-07	Gbanikola	Outdoors	An. gambiae	Heterozygote
2016-07	Gbanikola	Outdoors	An. gambiae	Heterozygote
2016-07	Gbanikola	Outdoors	An. gambiae	Standard
2016-07	Gbanikola	Outdoors	An. gambiae	Standard
2016-07	Gbanikola	Outdoors	An. coluzzii	Inverted
2016-07	Gbanikola	Indoors	An. gambiae	Heterozygote
2016-07	Gbanikola	Indoors	An. coluzzii	Standard
2016-07	Gbanikola	Indoors	An. gambiae	Standard
2016-07	Gbanikola	Indoors	An. gambiae	Heterozygote
2016-07	Gbanikola	Indoors	An. gambiae	Heterozygote
2016-07	Gbanikola	Indoors	An. gambiae	Inverted
2016-07	Gbanikola	Indoors	An. coluzzii	Heterozygote
2016-07	PK10	Outdoors	An. gambiae	Heterozygote
2016-07	PK10	Outdoors	An. gambiae	Heterozygote
2016-07	PK10	Outdoors	An. gambiae	Heterozygote
2016-07	PK10	Outdoors	An. gambiae	Inverted
2016-07	PK10	Outdoors	An. gambiae	Standard
2016-07	PK10	Outdoors	An. gambiae	Standard
2016-07	PK10	Outdoors	An. gambiae	Standard
2016-07	PK10	Outdoors	An. gambiae	Inverted
2016-07	PK10	Outdoors	An. gambiae	Standard
2016-07	PK10	Outdoors	An. gambiae	Heterozygote
2016-07	PK10	Outdoors	An. gambiae	Heterozygote
2016-07	PK10	Outdoors	An. gambiae	Heterozygote
2016-07	PK10	Outdoors	An. gambiae	Standard
2016-07	PK10	Outdoors	An. gambiae	Heterozygote
2016-07	PK10	Outdoors	An. gambiae	Heterozygote
2016-07	PK10	Outdoors	An. gambiae	Heterozygote
2016-07	PK10	Outdoors	An. gambiae	Standard
2016-07	PK10	Indoors	An. gambiae	Standard
2016-07	PK10	Indoors	An. gambiae	Inverted
2016-07	PK10	Indoors	An. coluzzii	Unknown
2016-07	Ouango	Indoors	An. coluzzii	Heterozygote
2016-07	Ouango	Indoors	An. gambiae	Heterozygote
2016-07	Ouango	Indoors	An. gambiae	Heterozygote
2016-07	Ouango	Indoors	An. gambiae	Standard
2016-07	Ouango	Indoors	An. gambiae	Heterozygote
2016-07	Ouango	Indoors	An. gambiae	Heterozygote
2016-07	Ouango	Indoors	An. coluzzii	Inverted
2016-07	Ouango	Indoors	An. gambiae	Inverted
2016-07	Ouango	Indoors	An. gambiae	Heterozygote
2016-07	Ouango	Indoors	An. gambiae	Inverted
2016-07	Ouango	Indoors	An. gambiae	Inverted
2016-07	Ouango	Indoors	An. gambiae	Heterozygote
2016-07	Ouango	Indoors	An. gambiae	Standard
2016-07	Ouango	Indoors	An. gambiae	Standard
2016-07	Ouango	Indoors	An. gambiae	Standard
2016-07	Ouango	Indoors	An. gambiae	Standard
2016-07	Ouango	Indoors	An. gambiae	Inverted
2016-07	Ouango	Indoors	An. gambiae	Standard
2016-07	Ouango	Indoors	An. gambiae	Inverted
2016-07	Ouango	Indoors	An. coluzzii	Standard
2016-07	Ouango	Indoors	An. gambiae	Standard
2016-07	Ouango	Indoors	An. gambiae	Standard
2016-07	Ouango	Indoors	An. gambiae	Standard
2016-07	Ouango	Indoors	An. gambiae	Standard
2016-07	Ouango	Indoors	An. gambiae	Inverted
2016-07	Ouango	Indoors	An. gambiae	Unknown
2016-07	Ouango	Indoors	An. gambiae	Heterozygote
2016-07	Ouango	Outdoors	An. gambiae	Heterozygote
2016-07	Ouango	Outdoors	An. gambiae	Heterozygote
2016-07	Ouango	Outdoors	An. gambiae	Standard
2016-07	Ouango	Outdoors	An. gambiae	Unknown
2016-07	Ouango	Outdoors	An. gambiae	Standard
2016-07	Ouango	Outdoors	An. gambiae	Standard
2016-07	Ouango	Outdoors	An. coluzzii	Standard
2016-07	Ouango	Outdoors	An. gambiae	Standard
2016-07	Ouango	Outdoors	An. gambiae	Standard
2016-07	Ouango	Outdoors	An. gambiae	Standard
2016-07	Ouango	Outdoors	An. gambiae	Inverted
2016-07	Ouango	Outdoors	An. gambiae	Inverted
2016-07	Ouango	Outdoors	An. gambiae	Inverted
2016-07	Ouango	Outdoors	An. gambiae	Inverted
2016-07	Ouango	Outdoors	An. gambiae	Heterozygote
2016-07	Ouango	Outdoors	An. gambiae	Inverted
2016-07	Ouango	Outdoors	An. gambiae	Standard
2016-07	Ouango	Outdoors	An. gambiae	Heterozygote
2016-07	Ouango	Outdoors	An. gambiae	Inverted
2016-07	Ouango	Outdoors	An. gambiae	Heterozygote
2016-07	Ouango	Outdoors	An. gambiae	Standard
2016-07	Ouango	Outdoors	An. gambiae	Heterozygote
2016-07	Ouango	Outdoors	An. gambiae	Standard
2016-07	Ouango	Outdoors	An. gambiae	Unknown
2016-07	Ouango	Outdoors	An. coluzzii	Standard
2016-07	Ouango	Outdoors	An. gambiae	Standard
2016-07	Ouango	Outdoors	An. gambiae	Standard
2016-07	Ouango	Outdoors	An. gambiae	Heterozygote
2016-07	Ouango	Outdoors	An. gambiae	Standard
2016-07	PK10	Outdoors	An. gambiae	Standard
2016-07	PK10	Outdoors	An. gambiae	Heterozygote
2016-07	PK10	Outdoors	An. gambiae	Standard
2016-07	PK10	Outdoors	An. gambiae	Standard
2016-07	PK10	Outdoors	An. gambiae	Standard
2016-07	PK10	Outdoors	An. gambiae	Heterozygote
2016-07	PK10	Indoors	An. gambiae	Standard
2016-07	PK10	Indoors	An. gambiae	Standard
2016-07	PK10	Indoors	An. gambiae	Heterozygote
2016-07	PK10	Indoors	An. gambiae	Standard
2016-07	PK10	Indoors	An. gambiae	Unknown
2016-07	PK10	Indoors	An. gambiae	Inverted
2016-07	PK10	Indoors	An. gambiae	Standard
2016-07	PK10	Indoors	An. gambiae	Standard
2016-07	PK10	Indoors	An. gambiae	Heterozygote
2016-07	PK10	Indoors	An. gambiae	Unknown
2016-07	PK10	Indoors	An. gambiae	Heterozygote
2016-07	PK10	Indoors	An. gambiae	Standard
2016-07	PK10	Indoors	An. gambiae	Heterozygote
2016-07	PK10	Indoors	An. gambiae	Heterozygote
2016-07	PK10	Indoors	An. gambiae	Standard
2016-07	PK10	Indoors	An. gambiae	Standard
2016-07	PK10	Indoors	An. gambiae	Inverted
2016-07	PK10	Outdoors	An. gambiae	Standard
2016-07	PK10	Outdoors	An. coluzzii	Standard
2016-07	PK10	Outdoors	An. gambiae	Inverted
2016-07	PK10	Outdoors	An. gambiae	Inverted
2016-07	PK10	Outdoors	An. gambiae	Standard
2016-07	PK10	Outdoors	An. gambiae	Heterozygote
2016-07	PK10	Outdoors	An. gambiae	Unknown
2016-07	PK10	Outdoors	An. gambiae	Standard
2016-07	Ouango	Indoors	An. gambiae	Heterozygote
2016-07	Ouango	Indoors	An. gambiae	Heterozygote
2016-07	Ouango	Indoors	An. gambiae	Heterozygote
2016-07	Ouango	Indoors	An. gambiae	Heterozygote
2016-07	Ouango	Indoors	An. coluzzii	Standard
2016-07	Ouango	Indoors	An. gambiae	Inverted
2016-07	Ouango	Indoors	An. gambiae	Heterozygote
2016-07	Ouango	Indoors	An. gambiae	Inverted
2016-07	Ouango	Indoors	An. coluzzii	Inverted
2016-07	Ouango	Indoors	An. gambiae	Inverted
2016-07	Ouango	Indoors	An. gambiae	Standard
2016-07	Ouango	Indoors	An. gambiae	Unknown
2016-07	Ouango	Indoors	An. gambiae	Heterozygote
2016-07	Ouango	Outdoors	An. gambiae	Standard
2016-07	Ouango	Indoors	An. gambiae	Heterozygote
2016-07	Ouango	Indoors	An. gambiae	Inverted
2016-07	Ouango	Indoors	An. gambiae	Heterozygote
2016-07	Ouango	Indoors	An. coluzzii	Inverted
2016-07	Ouango	Indoors	An. gambiae	Unknown
2016-07	Ouango	Indoors	An. gambiae	Standard
2016-07	Ouango	Indoors	An. gambiae	Standard
2016-07	Ouango	Indoors	An. gambiae	Standard
2016-07	Ouango	Indoors	An. gambiae	Inverted
2016-07	Ouango	Indoors	An. gambiae	Standard
2016-07	Ouango	Indoors	An. gambiae	Standard
2016-07	Ouango	Indoors	An. gambiae	Heterozygote
2016-07	Ouango	Indoors	An. gambiae	Inverted
2016-07	Ouango	Indoors	An. gambiae	Heterozygote
2016-07	Ouango	Indoors	An. gambiae	Heterozygote
2016-07	Ouango	Indoors	An. coluzzii	Heterozygote
2016-07	Ouango	Indoors	An. gambiae	Inverted
2016-07	Ouango	Indoors	An. gambiae	Heterozygote
2016-07	Ouango	Indoors	An. gambiae	Inverted
2016-07	Ouango	Indoors	An. gambiae	Heterozygote
2016-07	Ouango	Indoors	An. coluzzii	Heterozygote
2016-07	Ouango	Indoors	An. gambiae	Standard
2016-07	Ouango	Outdoors	An. gambiae	Heterozygote
2016-07	Ouango	Outdoors	An. gambiae	Heterozygote
2016-07	Ouango	Outdoors	An. gambiae	Heterozygote
2016-07	Ouango	Outdoors	An. gambiae	Heterozygote
2016-07	Ouango	Outdoors	An. gambiae	Heterozygote
2016-07	Ouango	Outdoors	An. gambiae	Standard
2016-07	Ouango	Outdoors	An. gambiae	Standard
2016-07	Ouango	Outdoors	An. gambiae	Heterozygote
2016-07	Ouango	Outdoors	An. gambiae	Heterozygote
2016-07	Ouango	Outdoors	An. gambiae	Heterozygote
2016-07	Ouango	Outdoors	An. coluzzii	Heterozygote
2016-07	Ouango	Outdoors	An. gambiae	Standard
2016-07	Ouango	Outdoors	An. gambiae	Standard
2016-07	Ouango	Outdoors	An. gambiae	Standard
2016-07	Ouango	Outdoors	An. gambiae	Standard
2016-07	Ouango	Outdoors	An. gambiae	Standard
2016-07	Ouango	Outdoors	An. gambiae	Heterozygote
2016-07	Ouango	Outdoors	An. gambiae	Inverted
2016-07	Ouango	Outdoors	An. gambiae	Inverted
2016-07	Ouango	Outdoors	An. gambiae	Heterozygote
2016-07	Ouango	Outdoors	An. gambiae	Standard
2016-07	Ouango	Outdoors	An. gambiae	Heterozygote
2016-07	Ouango	Outdoors	An. gambiae	Heterozygote
2016-07	Ouango	Outdoors	An. gambiae	Heterozygote
2016-07	Ouango	Outdoors	An. gambiae	Heterozygote
2016-07	Ouango	Outdoors	An. gambiae	Standard
2016-07	Ouango	Outdoors	An. coluzzii	Inverted
2016-07	Ouango	Outdoors	An. gambiae	Heterozygote
2016-07	Ouango	Outdoors	An. gambiae	Standard
2016-07	Ouango	Outdoors	An. gambiae	Inverted
2016-07	Ouango	Indoors	An. gambiae	Standard
2016-07	Ouango	Indoors	An. gambiae	Heterozygote
2016-07	Ouango	Indoors	An. gambiae	Heterozygote
2016-07	Ouango	Indoors	An. gambiae	Standard
2016-07	Ouango	Indoors	An. coluzzii	Heterozygote
2016-07	Ouango	Indoors	An. gambiae	Standard
2016-07	Ouango	Indoors	An. gambiae	Heterozygote
2016-07	Ouango	Indoors	An. gambiae	Standard
2016-07	Ouango	Indoors	An. gambiae	Heterozygote
2016-07	Ouango	Indoors	An. gambiae	Standard
2016-07	Ouango	Indoors	An. gambiae	Standard
2016-07	Ouango	Indoors	An. coluzzii	Inverted
2016-07	PK10	Indoors	An. gambiae	Heterozygote
2016-07	PK10	Indoors	An. gambiae	Heterozygote
2016-07	PK10	Indoors	An. gambiae	Standard
2016-07	PK10	Indoors	An. gambiae	Standard
2016-07	Ouango	Indoors	An. gambiae	Standard
2016-07	Ouango	Indoors	An. gambiae	Heterozygote
2016-07	Ouango	Indoors	An. gambiae	Inverted
2016-07	Ouango	Indoors	An. gambiae	Heterozygote
2016-07	Ouango	Indoors	An. gambiae	Standard
2016-07	Ouango	Indoors	An. gambiae	Inverted
2016-08	Gbanikola	Outdoors	An. coluzzii	Heterozygote
2016-08	Gbanikola	Outdoors	An. gambiae	Heterozygote
2016-08	Gbanikola	Outdoors	An. gambiae	Heterozygote
2016-08	Gbanikola	Outdoors	An. gambiae	Standard
2016-08	Gbanikola	Outdoors	An. gambiae	Heterozygote
2016-08	Gbanikola	Outdoors	An. coluzzii	Standard
2016-08	Gbanikola	Outdoors	An. gambiae	Standard
2016-08	Gbanikola	Outdoors	An. coluzzii	Inverted
2016-08	Gbanikola	Outdoors	An. gambiae	Standard
2016-08	Gbanikola	Outdoors	An. coluzzii	Heterozygote
2016-08	Gbanikola	Outdoors	An. coluzzii	Standard
2016-08	Gbanikola	Outdoors	An. gambiae	Inverted
2016-08	Gbanikola	Outdoors	An. coluzzii	Heterozygote
2016-08	Gbanikola	Outdoors	An. gambiae	Heterozygote
2016-08	Gbanikola	Outdoors	An. gambiae	Heterozygote
2016-08	Gbanikola	Outdoors	An. gambiae	Inverted
2016-08	Gbanikola	Outdoors	An. gambiae	Inverted
2016-08	Gbanikola	Outdoors	An. coluzzii	Standard
2016-08	Gbanikola	Outdoors	An. coluzzii	Heterozygote
2016-08	Gbanikola	Outdoors	An. gambiae	Heterozygote
2016-08	Gbanikola	Outdoors	An. coluzzii	Heterozygote
2016-08	Gbanikola	Outdoors	An. gambiae	Inverted
2016-08	Gbanikola	Outdoors	An. gambiae	Standard
2016-08	Gbanikola	Outdoors	An. coluzzii	Inverted
2016-08	Gbanikola	Outdoors	An. gambiae	Inverted
2016-08	Gbanikola	Outdoors	An. gambiae	Inverted
2016-08	Gbanikola	Outdoors	An. coluzzii	Inverted
2016-08	Gbanikola	Outdoors	An. coluzzii	Standard
2016-08	Gbanikola	Outdoors	An. coluzzii	Inverted
2016-08	Gbanikola	Outdoors	An. coluzzii	Standard
2016-08	Gbanikola	Outdoors	An. coluzzii	Heterozygote
2016-08	Gbanikola	Outdoors	An. coluzzii	Heterozygote
2016-08	Gbanikola	Outdoors	An. coluzzii	Heterozygote
2016-08	Gbanikola	Outdoors	An. coluzzii	Standard
2016-08	Gbanikola	Outdoors	An. coluzzii	Heterozygote
2016-08	Gbanikola	Outdoors	An. coluzzii	Heterozygote
2016-08	Gbanikola	Outdoors	An. gambiae	Inverted
2016-08	Gbanikola	Indoors	An. coluzzii	Standard
2016-08	Gbanikola	Indoors	An. coluzzii	Standard
2016-08	Gbanikola	Indoors	An. coluzzii	Heterozygote
2016-08	Gbanikola	Indoors	An. coluzzii	Inverted
2016-08	Gbanikola	Indoors	An. gambiae	Standard
2016-08	Gbanikola	Indoors	An. gambiae	Inverted
2016-08	Gbanikola	Indoors	An. coluzzii	Heterozygote
2016-08	Gbanikola	Indoors	An. gambiae	Standard
2016-08	Gbanikola	Indoors	An. gambiae	Standard
2016-08	Gbanikola	Indoors	An. coluzzii	Standard
2016-08	Gbanikola	Indoors	An. gambiae	Standard
2016-08	Gbanikola	Indoors	An. coluzzii	Heterozygote
2016-08	Gbanikola	Indoors	An. coluzzii	Heterozygote
2016-08	Gbanikola	Indoors	An. coluzzii	Inverted
2016-08	Gbanikola	Indoors	An. gambiae	Heterozygote
2016-08	Gbanikola	Indoors	An. gambiae	Standard
2016-08	Gbanikola	Indoors	An. gambiae	Inverted
2016-08	Gbanikola	Indoors	An. coluzzii	Inverted
2016-08	Gbanikola	Indoors	An. gambiae	Heterozygote
2016-08	Gbanikola	Indoors	An. coluzzii	Inverted
2016-08	Gbanikola	Indoors	An. coluzzii	Heterozygote
2016-08	Gbanikola	Indoors	An. coluzzii	Inverted
2016-08	Gbanikola	Indoors	An. gambiae	Inverted
2016-08	Gbanikola	Indoors	An. gambiae	Inverted
2016-08	Gbanikola	Indoors	An. gambiae	Standard
2016-08	Gbanikola	Indoors	An. coluzzii	Heterozygote
2016-08	Gbanikola	Indoors	An. coluzzii	Heterozygote
2016-08	Gbanikola	Indoors	An. coluzzii	Standard
2016-08	Gbanikola	Indoors	An. gambiae	Heterozygote
2016-08	Gbanikola	Indoors	An. gambiae	Heterozygote
2016-08	Gbanikola	Indoors	An. gambiae	Inverted
2016-08	Gbanikola	Indoors	An. gambiae	Standard
2016-08	Gbanikola	Indoors	An. coluzzii	Heterozygote
2016-08	Gbanikola	Indoors	An. gambiae	Standard
2016-08	Gbanikola	Indoors	An. coluzzii	Inverted
2016-08	Gbanikola	Indoors	An. gambiae	Inverted
2016-08	Gbanikola	Indoors	An. gambiae	Heterozygote
2016-08	Gbanikola	Indoors	An. gambiae	Heterozygote
2016-08	Gbanikola	Indoors	An. gambiae	Standard
2016-08	Gbanikola	Indoors	An. gambiae	Heterozygote
2016-08	Gbanikola	Indoors	An. gambiae	Inverted
2016-08	Gbanikola	Indoors	An. gambiae	Inverted
2016-08	Gbanikola	Indoors	An. gambiae	Standard
2016-08	Gbanikola	Indoors	An. coluzzii	Heterozygote
2016-08	Gbanikola	Indoors	An. coluzzii	Standard
2016-08	Gbanikola	Indoors	An. gambiae	Inverted
2016-08	Gbanikola	Indoors	An. coluzzii	Heterozygote
2016-08	Gbanikola	Indoors	An. gambiae	Heterozygote
2016-08	Gbanikola	Indoors	An. gambiae	Heterozygote
2016-08	Gbanikola	Indoors	An. coluzzii	Inverted
2016-08	Gbanikola	Indoors	An. coluzzii	Heterozygote
2016-08	Gbanikola	Indoors	An. gambiae	Heterozygote
2016-08	Gbanikola	Indoors	An. coluzzii	Inverted
2016-08	Ile_des_Singes	Indoors	An. coluzzii	Inverted
2016-08	Ile_des_Singes	Indoors	An. gambiae	Heterozygote
2016-08	Ile_des_Singes	Indoors	An. gambiae	Inverted
2016-08	Ile_des_Singes	Indoors	An. gambiae	Inverted
2016-08	Ile_des_Singes	Indoors	An. gambiae	Heterozygote
2016-08	Ile_des_Singes	Indoors	An. gambiae	Standard
2016-08	Ile_des_Singes	Indoors	An. gambiae	Standard
2016-08	Ile_des_Singes	Indoors	An. gambiae	Standard
2016-08	Ile_des_Singes	Indoors	An. gambiae	Standard
2016-08	Ile_des_Singes	Indoors	An. coluzzii	Heterozygote
2016-08	Ile_des_Singes	Indoors	An. gambiae	Heterozygote
2016-08	Ile_des_Singes	Indoors	An. gambiae	Inverted
2016-08	Ile_des_Singes	Indoors	An. coluzzii	Inverted
2016-08	Ile_des_Singes	Indoors	An. gambiae	Standard
2016-08	Ile_des_Singes	Indoors	An. coluzzii	Inverted
2016-08	Ile_des_Singes	Indoors	An. gambiae	Inverted
2016-08	Ile_des_Singes	Indoors	An. gambiae	Inverted
2016-08	Ile_des_Singes	Indoors	An. gambiae	Heterozygote
2016-08	Ile_des_Singes	Indoors	An. gambiae	Inverted
2016-08	Ile_des_Singes	Indoors	An. gambiae	Standard
2016-08	Ile_des_Singes	Indoors	An. gambiae	Heterozygote
2016-08	Ile_des_Singes	Indoors	An. gambiae	Heterozygote
2016-08	Ile_des_Singes	Indoors	An. coluzzii	Heterozygote
2016-08	Ile_des_Singes	Indoors	An. gambiae	Standard
2016-08	Ile_des_Singes	Indoors	An. gambiae	Standard
2016-08	PK10	Outdoors	An. gambiae	Standard
2016-08	Ile_des_Singes	Indoors	An. gambiae	Heterozygote
2016-08	Ouango	Indoors	An. gambiae	Standard
2016-08	PK10	Indoors	An. gambiae	Inverted
2016-08	Ile_des_Singes	Indoors	An. coluzzii	Heterozygote
2016-08	Ile_des_Singes	Indoors	An. coluzzii	Standard
2016-08	Ile_des_Singes	Indoors	An. coluzzii	Standard
2016-08	Ile_des_Singes	Indoors	An. gambiae	Standard
2016-08	Ile_des_Singes	Indoors	An. gambiae	Heterozygote
2016-08	Ile_des_Singes	Indoors	An. gambiae	Inverted
2016-08	Ile_des_Singes	Outdoors	An. coluzzii	Inverted
2016-08	Ile_des_Singes	Outdoors	An. gambiae	Standard
2016-08	Ile_des_Singes	Outdoors	An. gambiae	Heterozygote
2016-08	Ile_des_Singes	Outdoors	An. gambiae	Standard
2016-08	Ile_des_Singes	Outdoors	An. gambiae	Standard
2016-08	Ile_des_Singes	Outdoors	An. gambiae	Standard
2016-08	Ile_des_Singes	Outdoors	An. gambiae	Standard
2016-08	Gbanikola	Outdoors	An. gambiae	Heterozygote
2016-08	Gbanikola	Outdoors	An. gambiae	Heterozygote
2016-08	Gbanikola	Outdoors	An. coluzzii	Inverted
2016-08	Gbanikola	Outdoors	An. coluzzii	Inverted
2016-08	Ile_des_Singes	Indoors	An. gambiae	Inverted
2016-08	Gbanikola	Outdoors	An. coluzzii	Inverted
2016-08	Gbanikola	Outdoors	An. gambiae	Standard
2016-08	Gbanikola	Outdoors	An. coluzzii	Heterozygote
2016-08	Ouango	Outdoors	An. gambiae	Inverted
2016-08	Gbanikola	Outdoors	An. coluzzii	Inverted
2016-08	Gbanikola	Outdoors	An. gambiae	Heterozygote
2016-08	Gbanikola	Outdoors	An. coluzzii	Heterozygote
2016-08	Gbanikola	Outdoors	An. gambiae	Standard
2016-08	Gbanikola	Outdoors	An. coluzzii	Standard
2016-08	Gbanikola	Outdoors	An. gambiae	Heterozygote
2016-08	Gbanikola	Outdoors	An. gambiae	Heterozygote
2016-08	Gbanikola	Outdoors	An. coluzzii	Standard
2016-08	Gbanikola	Outdoors	An. coluzzii	Heterozygote
2016-08	Gbanikola	Outdoors	An. coluzzii	Standard
2016-08	Gbanikola	Indoors	An. coluzzii	Heterozygote
2016-08	Gbanikola	Indoors	An. coluzzii	Heterozygote
2016-08	Gbanikola	Indoors	An. gambiae	Inverted
2016-08	Gbanikola	Indoors	An. gambiae	Standard
2016-08	Gbanikola	Indoors	An. coluzzii	Inverted
2016-08	Gbanikola	Indoors	An. coluzzii	Standard
2016-08	Gbanikola	Indoors	An. gambiae	Standard
2016-08	Gbanikola	Indoors	An. gambiae	Inverted
2016-08	Gbanikola	Indoors	An. coluzzii	Heterozygote
2016-08	Gbanikola	Indoors	An. gambiae	Inverted
2016-08	Gbanikola	Indoors	An. gambiae	Standard
2016-08	Gbanikola	Indoors	An. gambiae	Standard
2016-08	Gbanikola	Indoors	An. gambiae	Standard
2016-08	Gbanikola	Indoors	An. gambiae	Standard
2016-08	Gbanikola	Indoors	An. gambiae	Standard
2016-08	Gbanikola	Indoors	An. coluzzii	Heterozygote
2016-08	Gbanikola	Indoors	An. coluzzii	Standard
2016-08	Gbanikola	Indoors	An. coluzzii	Standard
2016-08	Gbanikola	Indoors	An. gambiae	Standard
2016-08	Gbanikola	Indoors	An. coluzzii	Standard
2016-08	Gbanikola	Indoors	An. gambiae	Standard
2016-08	Gbanikola	Indoors	An. coluzzii	Heterozygote
2016-08	Gbanikola	Indoors	An. gambiae	Heterozygote
2016-08	Gbanikola	Indoors	An. coluzzii	Standard
2016-08	Gbanikola	Indoors	An. gambiae	Heterozygote
2016-08	Gbanikola	Indoors	An. coluzzii	Standard
2016-08	Gbanikola	Indoors	An. coluzzii	Heterozygote
2016-08	Gbanikola	Indoors	An. gambiae	Heterozygote
2016-08	Gbanikola	Indoors	An. gambiae	Standard
2016-08	Gbanikola	Indoors	An. gambiae	Heterozygote
2016-08	Gbanikola	Indoors	An. gambiae	Standard
2016-08	Gbanikola	Indoors	An. coluzzii	Standard
2016-08	Gbanikola	Indoors	An. gambiae	Heterozygote
2016-08	Gbanikola	Indoors	An. coluzzii	Inverted
2016-08	Gbanikola	Indoors	An. gambiae	Standard
2016-08	Gbanikola	Indoors	An. gambiae	Standard
2016-08	Gbanikola	Indoors	An. coluzzii	Heterozygote
2016-08	Gbanikola	Indoors	An. gambiae	Standard
2016-08	Gbanikola	Indoors	An. gambiae	Standard
2016-08	Gbanikola	Indoors	An. gambiae	Standard
2016-08	Gbanikola	Indoors	An. coluzzii	Standard
2016-08	Gbanikola	Indoors	An. coluzzii	Standard
2016-08	Gbanikola	Indoors	An. gambiae	Standard
2016-08	Gbanikola	Indoors	An. gambiae	Standard
2016-08	Gbanikola	Indoors	An. gambiae	Standard
2016-08	Gbanikola	Indoors	An. gambiae	Standard
2016-08	Gbanikola	Indoors	An. gambiae	Standard
2016-08	Gbanikola	Indoors	An. coluzzii	Inverted
2016-08	Gbanikola	Indoors	An. coluzzii	Heterozygote
2016-08	Gbanikola	Indoors	An. gambiae	Inverted
2016-08	Gbanikola	Indoors	An. gambiae	Inverted
2016-08	Gbanikola	Indoors	An. gambiae	Standard
2016-08	Gbanikola	Indoors	An. gambiae	Standard
2016-08	Gbanikola	Indoors	An. gambiae	Standard
2016-08	Gbanikola	Outdoors	An. gambiae	Heterozygote
2016-08	Gbanikola	Outdoors	An. gambiae	Inverted
2016-08	Gbanikola	Outdoors	An. gambiae	Inverted
2016-08	Gbanikola	Outdoors	An. gambiae	Inverted
2016-08	Gbanikola	Outdoors	An. gambiae	Heterozygote
2016-08	Gbanikola	Outdoors	An. gambiae	Heterozygote
2016-08	Gbanikola	Outdoors	An. gambiae	Heterozygote
2016-08	Gbanikola	Outdoors	An. gambiae	Heterozygote
2016-08	Gbanikola	Outdoors	An. gambiae	Heterozygote
2016-08	Gbanikola	Outdoors	An. gambiae	Standard
2016-08	Gbanikola	Outdoors	An. gambiae	Standard
2016-08	Gbanikola	Outdoors	An. gambiae	Standard
2016-08	Gbanikola	Outdoors	An. gambiae	Inverted
2016-08	Gbanikola	Outdoors	An. gambiae	Standard
2016-08	Gbanikola	Outdoors	An. gambiae	Standard
2016-08	Gbanikola	Outdoors	An. gambiae	Standard
2016-08	Gbanikola	Outdoors	An. gambiae	Inverted
2016-08	Gbanikola	Outdoors	An. gambiae	Heterozygote
2016-08	Gbanikola	Outdoors	An. gambiae	Inverted
2016-08	Gbanikola	Outdoors	An. gambiae	Standard
2016-08	Gbanikola	Outdoors	An. coluzzii	Inverted
2016-08	Gbanikola	Outdoors	An. coluzzii	Heterozygote
2016-08	Gbanikola	Outdoors	An. gambiae	Standard
2016-08	Gbanikola	Outdoors	An. coluzzii	Inverted
2016-08	Gbanikola	Outdoors	An. gambiae	Standard
2016-08	Gbanikola	Outdoors	An. coluzzii	Inverted
2016-08	Gbanikola	Outdoors	An. gambiae	Inverted
2016-08	Gbanikola	Outdoors	An. gambiae	Standard
2016-08	Gbanikola	Outdoors	An. coluzzii	Inverted
2016-08	Gbanikola	Outdoors	An. coluzzii	Heterozygote
2016-08	Gbanikola	Outdoors	An. gambiae	Heterozygote
2016-08	Gbanikola	Outdoors	An. coluzzii	Standard
2016-08	Gbanikola	Outdoors	An. coluzzii	Inverted
2016-08	Gbanikola	Outdoors	An. coluzzii	Inverted
2016-08	Gbanikola	Outdoors	An. gambiae	Heterozygote
2016-08	Gbanikola	Outdoors	An. coluzzii	Heterozygote
2016-08	Gbanikola	Outdoors	An. coluzzii	Heterozygote
2016-08	Gbanikola	Outdoors	An. coluzzii	Heterozygote
2016-08	PK10	Indoors	An. gambiae	Inverted
2016-08	Gbanikola	Outdoors	An. gambiae	Inverted
2016-08	Gbanikola	Outdoors	An. coluzzii	Inverted
2016-08	Gbanikola	Outdoors	An. gambiae	Standard
2016-08	Gbanikola	Outdoors	An. coluzzii	Inverted
2016-08	Gbanikola	Outdoors	An. gambiae	Standard
2016-08	Gbanikola	Outdoors	An. gambiae	Standard
2016-08	Gbanikola	Outdoors	An. gambiae	Standard
2016-08	Gbanikola	Outdoors	An. coluzzii	Standard
2016-08	Gbanikola	Outdoors	An. gambiae	Standard
2016-08	Gbanikola	Outdoors	An. coluzzii	Standard
2016-08	Gbanikola	Outdoors	An. coluzzii	Standard
2016-08	Gbanikola	Outdoors	An. gambiae	Inverted
2016-08	Gbanikola	Outdoors	An. gambiae	Inverted
2016-08	Gbanikola	Outdoors	An. coluzzii	Heterozygote
2016-08	Gbanikola	Outdoors	An. coluzzii	Heterozygote
2016-08	Gbanikola	Outdoors	An. coluzzii	Standard
2016-08	PK10	Indoors	An. gambiae	Inverted
2016-08	Gbanikola	Indoors	An. coluzzii	Inverted
2016-08	Gbanikola	Indoors	An. gambiae	Standard
2016-08	Gbanikola	Indoors	An. gambiae	Standard
2016-08	Gbanikola	Indoors	An. coluzzii	Heterozygote
2016-08	Gbanikola	Indoors	An. gambiae	Heterozygote
2016-08	Gbanikola	Indoors	An. gambiae	Standard
2016-08	Gbanikola	Indoors	An. coluzzii	Inverted
2016-08	Gbanikola	Indoors	An. coluzzii	Heterozygote
2016-08	Gbanikola	Indoors	An. gambiae	Standard
2016-08	Gbanikola	Indoors	An. gambiae	Inverted
2016-08	Gbanikola	Indoors	An. gambiae	Standard
2016-08	Gbanikola	Indoors	An. gambiae	Standard
2016-08	Gbanikola	Indoors	An. coluzzii	Heterozygote
2016-08	Gbanikola	Indoors	An. coluzzii	Standard
2016-08	Gbanikola	Indoors	An. coluzzii	Standard
2016-08	Gbanikola	Indoors	An. coluzzii	Inverted
2016-08	Gbanikola	Indoors	An. coluzzii	Inverted
2016-08	Gbanikola	Indoors	An. gambiae	Inverted
2016-08	Gbanikola	Indoors	An. coluzzii	Heterozygote
2016-08	Gbanikola	Indoors	An. coluzzii	Inverted
2016-08	Gbanikola	Indoors	An. coluzzii	Inverted
2016-08	Gbanikola	Indoors	An. gambiae	Standard
2016-08	Gbanikola	Indoors	An. gambiae	Inverted
2016-08	Gbanikola	Indoors	An. gambiae	Heterozygote
2016-08	Gbanikola	Indoors	An. gambiae	Heterozygote
2016-08	Gbanikola	Indoors	An. coluzzii	Standard
2016-08	Gbanikola	Outdoors	An. coluzzii	Heterozygote
2016-08	Gbanikola	Outdoors	An. coluzzii	Standard
2016-08	Gbanikola	Outdoors	An. gambiae	Heterozygote
2016-08	Gbanikola	Outdoors	An. gambiae	Heterozygote
2016-08	Gbanikola	Outdoors	An. coluzzii	Standard
2016-08	Gbanikola	Outdoors	An. coluzzii	Standard
2016-08	Ile_des_Singes	Outdoors	An. gambiae	Standard
2016-08	Ile_des_Singes	Outdoors	An. coluzzii	Standard
2016-08	Ile_des_Singes	Outdoors	An. coluzzii	Inverted
2016-08	Ile_des_Singes	Outdoors	An. coluzzii	Inverted
2016-08	Ile_des_Singes	Indoors	An. coluzzii	Inverted
2016-08	Ile_des_Singes	Indoors	An. gambiae	Inverted
2016-08	Ile_des_Singes	Indoors	An. coluzzii	Heterozygote
2016-08	Ile_des_Singes	Indoors	An. coluzzii	Heterozygote
2016-08	Ile_des_Singes	Indoors	An. gambiae	Standard
2016-08	Ile_des_Singes	Indoors	An. coluzzii	Heterozygote
2016-08	Ile_des_Singes	Indoors	An. gambiae	Standard
2016-08	Ile_des_Singes	Indoors	An. gambiae	Standard
2016-08	Ile_des_Singes	Indoors	An. gambiae	Inverted
2016-08	Ile_des_Singes	Indoors	An. gambiae	Standard
2016-08	Ile_des_Singes	Indoors	An. gambiae	Standard
2016-08	Ile_des_Singes	Indoors	An. gambiae	Standard
2016-08	Ile_des_Singes	Outdoors	An. gambiae	Heterozygote
2016-08	Ile_des_Singes	Outdoors	An. gambiae	Heterozygote
2016-08	Ile_des_Singes	Outdoors	An. gambiae	Heterozygote
2016-08	Ile_des_Singes	Outdoors	An. gambiae	Heterozygote
2016-08	Ile_des_Singes	Outdoors	An. gambiae	Standard
2016-08	Ile_des_Singes	Outdoors	An. gambiae	Heterozygote
2016-08	Ile_des_Singes	Outdoors	An. gambiae	Heterozygote
2016-08	Ouango	Indoors	An. gambiae	Standard
2016-08	Gbanikola	Indoors	An. coluzzii	Standard
2016-08	Gbanikola	Indoors	An. gambiae	Inverted
2016-08	Gbanikola	Indoors	An. gambiae	Heterozygote
2016-08	Gbanikola	Indoors	An. gambiae	Standard
2016-08	Gbanikola	Indoors	An. gambiae	Standard
2016-08	Gbanikola	Indoors	An. gambiae	Standard
2016-08	Gbanikola	Indoors	An. coluzzii	Inverted
2016-08	Gbanikola	Indoors	An. gambiae	Standard
2016-08	Gbanikola	Indoors	An. coluzzii	Standard
2016-08	Gbanikola	Indoors	An. coluzzii	Heterozygote
2016-08	Gbanikola	Indoors	An. coluzzii	Inverted
2016-08	Gbanikola	Indoors	An. gambiae	Heterozygote
2016-08	Gbanikola	Indoors	An. gambiae	Heterozygote
2016-08	Gbanikola	Indoors	An. gambiae	Standard
2016-08	Gbanikola	Indoors	An. gambiae	Standard
2016-08	Gbanikola	Indoors	An. gambiae	Standard
2016-08	Gbanikola	Indoors	An. coluzzii	Heterozygote
2016-08	Gbanikola	Indoors	An. gambiae	Heterozygote
2016-08	Gbanikola	Indoors	An. gambiae	Inverted
2016-08	Gbanikola	Indoors	An. coluzzii	Heterozygote
2016-08	Gbanikola	Indoors	An. gambiae	Standard
2016-08	Gbanikola	Indoors	An. coluzzii	Heterozygote
2016-08	Gbanikola	Indoors	An. gambiae	Inverted
2016-08	Gbanikola	Indoors	An. coluzzii	Heterozygote
2016-08	Gbanikola	Indoors	An. gambiae	Standard
2016-08	Gbanikola	Indoors	An. coluzzii	Inverted
2016-08	Gbanikola	Indoors	An. coluzzii	Inverted
2016-08	Gbanikola	Indoors	An. coluzzii	Standard
2016-08	Gbanikola	Indoors	An. coluzzii	Heterozygote
2016-08	Gbanikola	Indoors	An. gambiae	Heterozygote
2016-08	Gbanikola	Indoors	An. coluzzii	Standard
2016-08	Gbanikola	Indoors	An. coluzzii	Heterozygote
2016-08	Gbanikola	Indoors	An. coluzzii	Heterozygote
2016-08	Gbanikola	Indoors	An. coluzzii	Inverted
2016-08	Gbanikola	Indoors	An. gambiae	Standard
2016-08	Gbanikola	Indoors	An. coluzzii	Standard
2016-08	Gbanikola	Indoors	An. coluzzii	Standard
2016-08	Gbanikola	Indoors	An. coluzzii	Heterozygote
2016-08	Gbanikola	Indoors	An. coluzzii	Heterozygote
2016-08	Gbanikola	Indoors	An. coluzzii	Inverted
2016-08	Gbanikola	Indoors	An. coluzzii	Standard
2016-08	Gbanikola	Indoors	An. coluzzii	Standard
2016-08	Gbanikola	Indoors	An. coluzzii	Standard
2016-08	Gbanikola	Indoors	An. coluzzii	Standard
2016-08	Gbanikola	Indoors	An. coluzzii	Heterozygote
2016-08	Gbanikola	Indoors	An. gambiae	Standard
2016-08	Gbanikola	Indoors	An. coluzzii	Standard
2016-08	Gbanikola	Indoors	An. coluzzii	Heterozygote
2016-08	Gbanikola	Indoors	An. coluzzii	Standard
2016-08	Gbanikola	Indoors	An. gambiae	Standard
2016-08	Gbanikola	Indoors	An. coluzzii	Inverted
2016-08	Gbanikola	Indoors	An. coluzzii	Standard
2016-08	Gbanikola	Indoors	An. gambiae	Standard
2016-08	Ouango	Indoors	An. gambiae	Standard
2016-08	Ouango	Indoors	An. gambiae	Standard
2016-08	Ouango	Outdoors	An. gambiae	Heterozygote
2016-08	Ouango	Outdoors	An. gambiae	Inverted
2016-08	Ouango	Outdoors	An. gambiae	Inverted
2016-08	Ouango	Outdoors	An. gambiae	Standard
2016-08	Ouango	Outdoors	An. gambiae	Standard
2016-08	Ouango	Outdoors	An. gambiae	Heterozygote
2016-08	Ouango	Outdoors	An. gambiae	Heterozygote
2016-08	PK10	Outdoors	An. gambiae	Heterozygote
2016-08	PK10	Outdoors	An. gambiae	Standard
2016-08	PK10	Outdoors	An. gambiae	Heterozygote
2016-08	PK10	Outdoors	An. gambiae	Standard
2016-08	PK10	Outdoors	An. gambiae	Heterozygote
2016-08	PK10	Outdoors	An. gambiae	Inverted
2016-08	PK10	Outdoors	An. gambiae	Heterozygote
2016-08	PK10	Outdoors	An. gambiae	Standard
2016-08	PK10	Outdoors	An. gambiae	Standard
2016-08	PK10	Outdoors	An. gambiae	Heterozygote
2016-08	PK10	Outdoors	An. gambiae	Heterozygote
2016-08	PK10	Outdoors	An. gambiae	Standard
2016-08	PK10	Outdoors	An. gambiae	Heterozygote
2016-08	PK10	Indoors	An. gambiae	Standard
2016-08	PK10	Indoors	An. gambiae	Inverted
2016-08	PK10	Indoors	An. gambiae	Standard
2016-08	PK10	Indoors	An. gambiae	Standard
2016-08	PK10	Indoors	An. gambiae	Standard
2016-08	PK10	Indoors	An. gambiae	Standard
2016-08	PK10	Indoors	An. gambiae	Inverted
2016-08	PK10	Indoors	An. gambiae	Heterozygote
2016-08	PK10	Indoors	An. gambiae	Heterozygote
2016-08	PK10	Indoors	An. gambiae	Inverted
2016-08	PK10	Indoors	An. gambiae	Inverted
2016-08	PK10	Indoors	An. gambiae	Inverted
2016-08	Ouango	Indoors	An. gambiae	Standard
2016-08	Ouango	Indoors	An. gambiae	Standard
2016-08	Ouango	Indoors	An. gambiae	Heterozygote
2016-08	Ouango	Indoors	An. gambiae	Standard
2016-08	Ouango	Indoors	An. gambiae	Standard
2016-08	Ouango	Indoors	An. coluzzii	Heterozygote
2016-08	Ouango	Indoors	An. gambiae	Standard
2016-08	Ouango	Indoors	An. gambiae	Standard
2016-08	Ouango	Indoors	An. gambiae	Standard
2016-08	Ouango	Indoors	An. gambiae	Standard
2016-08	Ouango	Indoors	An. gambiae	Heterozygote
2016-08	Ouango	Indoors	An. gambiae	Inverted
2016-08	Ouango	Indoors	An. gambiae	Standard
2016-08	Ouango	Indoors	An. gambiae	Heterozygote
2016-08	Ouango	Indoors	An. gambiae	Standard
2016-08	Ouango	Indoors	An. coluzzii	Standard
2016-08	Ouango	Indoors	An. gambiae	Standard
2016-08	Ouango	Outdoors	An. gambiae	Standard
2016-08	Ouango	Outdoors	An. coluzzii	Inverted
2016-08	PK10	Outdoors	An. gambiae	Inverted
2016-08	Ile_des_Singes	Indoors	An. coluzzii	Inverted
2016-08	Ouango	Indoors	An. gambiae	Inverted
2016-08	PK10	Indoors	An. gambiae	Inverted
2016-09	Gbanikola	Outdoors	An. gambiae	Inverted
2016-08	Ouango	Indoors	An. coluzzii	Inverted
2016-08	Ouango	Indoors	An. gambiae	Inverted
2016-08	Ouango	Indoors	An. gambiae	Inverted
2016-08	PK10	Indoors	An. coluzzii	Inverted
2016-08	Ouango	Indoors	An. gambiae	Standard
2016-08	Ouango	Outdoors	An. gambiae	Inverted
2016-08	PK10	Indoors	An. gambiae	Standard
2016-09	Gbanikola	Indoors	An. coluzzii	Inverted
2016-09	Gbanikola	Outdoors	An. gambiae	Inverted
2016-09	Gbanikola	Indoors	An. gambiae	Standard
2016-09	Gbanikola	Indoors	An. gambiae	Standard
2016-09	Gbanikola	Indoors	An. gambiae	Inverted
2016-09	Gbanikola	Outdoors	An. gambiae	Standard
2016-08	PK10	Indoors	An. gambiae	Inverted
2016-09	Gbanikola	Indoors	An. coluzzii	Inverted
2016-08	Ouango	Indoors	An. gambiae	Standard
2016-08	Ouango	Outdoors	An. gambiae	Standard
2016-08	Ouango	Indoors	An. gambiae	Heterozygote
2016-09	Ile_des_Singes	Outdoors	An. gambiae	Inverted
2016-09	Gbanikola	Indoors	An. gambiae	Heterozygote
2016-08	PK10	Indoors	An. gambiae	Inverted
2016-08	PK10	Indoors	An. gambiae	Inverted
2017-05	Ouango	Indoors	An. gambiae	Inverted
2016-08	PK10	Indoors	An. gambiae	Standard
2016-09	Gbanikola	Indoors	An. coluzzii	Inverted
2016-09	Gbanikola	Indoors	An. coluzzii	Inverted
2016-09	Gbanikola	Indoors	An. gambiae	Inverted
2016-09	Gbanikola	Indoors	An. gambiae	Standard
2016-08	PK10	Indoors	An. gambiae	Standard
2016-09	Gbanikola	Indoors	An. coluzzii	Inverted
2016-08	PK10	Indoors	An. gambiae	Inverted
2016-09	Gbanikola	Indoors	An. gambiae	Standard
2017-05	Ouango	Indoors	An. gambiae	Standard
2016-08	PK10	Indoors	An. gambiae	Inverted
2017-05	Ile_des_Singes	Indoors	An. gambiae	Standard
2017-05	Gbanikola	Outdoors	An. gambiae	Inverted
2017-05	Ouango	Indoors	An. gambiae	Inverted
2017-05	Ouango	Indoors	An. gambiae	Standard
2016-09	Gbanikola	Indoors	An. gambiae	Inverted
2017-05	Ouango	Indoors	An. gambiae	Inverted
2016-08	Ouango	Indoors	An. gambiae	Inverted
2016-08	PK10	Indoors	An. gambiae	Standard
2017-05	Gbanikola	Outdoors	An. gambiae	Inverted
2017-05	Ouango	Indoors	An. gambiae	Inverted
2016-08	Gbanikola	Outdoors	An. gambiae	Unknown
2016-08	Gbanikola	Outdoors	An. gambiae	Unknown
2016-08	Ile_des_Singes	Indoors	An. gambiae	Unknown
2016-08	Ile_des_Singes	Indoors	An. coluzzii	Unknown
2016-08	Ile_des_Singes	Indoors	An. coluzzii	Unknown
2016-08	Gbanikola	Outdoors	An. gambiae	Unknown
2016-08	Gbanikola	Outdoors	An. gambiae	Unknown
2016-08	Gbanikola	Outdoors	An. gambiae	Unknown
2016-08	Gbanikola	Indoors	An. gambiae	Unknown
2016-08	Gbanikola	Indoors	An. gambiae	Unknown
2016-08	Ouango	Outdoors	An. gambiae	Inverted
2016-08	Ouango	Outdoors	An. gambiae	Heterozygote
2016-08	Ouango	Outdoors	An. gambiae	Inverted
2016-08	Ouango	Outdoors	An. gambiae	Inverted
2016-08	Ouango	Outdoors	An. gambiae	Inverted
2016-08	Ouango	Outdoors	An. gambiae	Standard
2016-08	Ouango	Outdoors	An. gambiae	Standard
2016-08	Ouango	Outdoors	An. gambiae	Heterozygote
2016-08	Ouango	Outdoors	An. gambiae	Standard
2016-08	Ouango	Outdoors	An. gambiae	Heterozygote
2016-08	Ouango	Outdoors	An. gambiae	Heterozygote
2016-08	Ouango	Outdoors	An. gambiae	Unknown
2016-08	Ouango	Outdoors	An. gambiae	Inverted
2016-08	Ouango	Indoors	An. gambiae	Inverted
2016-08	Ouango	Indoors	An. gambiae	Standard
2016-08	Ouango	Indoors	An. gambiae	Standard
2016-08	Ouango	Indoors	An. gambiae	Standard
2016-08	Ouango	Indoors	An. gambiae	Unknown
2016-08	PK10	Indoors	An. gambiae	Inverted
2016-08	PK10	Indoors	An. gambiae	Standard
2016-08	PK10	Indoors	An. gambiae	Standard
2016-08	PK10	Indoors	An. gambiae	Standard
2016-08	PK10	Indoors	An. gambiae	Inverted
2016-08	PK10	Indoors	An. gambiae	Standard
2016-08	PK10	Indoors	An. coluzzii	Standard
2016-08	PK10	Indoors	An. gambiae	Inverted
2016-08	PK10	Indoors	An. gambiae	Inverted
2016-08	PK10	Indoors	An. gambiae	Inverted
2016-08	PK10	Indoors	An. gambiae	Standard
2016-08	PK10	Indoors	An. gambiae	Inverted
2016-08	PK10	Indoors	An. gambiae	Standard
2016-08	PK10	Indoors	An. gambiae	Inverted
2016-08	PK10	Indoors	An. gambiae	Standard
2016-08	PK10	Indoors	An. gambiae	Standard
2016-08	PK10	Indoors	An. gambiae	Inverted
2016-08	PK10	Indoors	An. gambiae	Inverted
2016-08	PK10	Indoors	An. gambiae	Inverted
2016-08	PK10	Indoors	An. gambiae	Inverted
2016-08	PK10	Indoors	An. gambiae	Inverted
2016-08	PK10	Indoors	An. gambiae	Standard
2016-08	PK10	Indoors	An. gambiae	Standard
2016-08	PK10	Indoors	An. gambiae	Heterozygote
2016-08	PK10	Indoors	An. gambiae	Inverted
2016-08	PK10	Indoors	An. gambiae	Heterozygote
2016-08	PK10	Indoors	An. gambiae	Inverted
2016-08	PK10	Outdoors	An. gambiae	Standard
2016-08	PK10	Outdoors	An. gambiae	Standard
2016-08	PK10	Outdoors	An. gambiae	Standard
2016-08	PK10	Outdoors	An. gambiae	Inverted
2016-08	PK10	Outdoors	An. gambiae	Heterozygote
2016-09	Ile_des_Singes	Indoors	An. gambiae	Inverted
2016-08	PK10	Outdoors	An. gambiae	Standard
2016-08	PK10	Outdoors	An. gambiae	Standard
2016-08	PK10	Outdoors	An. gambiae	Inverted
2016-08	PK10	Indoors	An. gambiae	Standard
2016-08	PK10	Indoors	An. gambiae	Inverted
2016-09	Ile_des_Singes	Indoors	An. gambiae	Standard
2016-09	Ile_des_Singes	Outdoors	An. gambiae	Inverted
2016-08	PK10	Indoors	An. gambiae	Standard
2016-08	PK10	Indoors	An. gambiae	Standard
2016-08	PK10	Indoors	An. gambiae	Inverted
2016-08	PK10	Indoors	An. gambiae	Heterozygote
2016-09	Gbanikola	Outdoors	An. gambiae	Heterozygote
2016-09	Gbanikola	Outdoors	An. gambiae	Standard
2016-09	Gbanikola	Outdoors	An. gambiae	Standard
2016-09	Gbanikola	Outdoors	An. coluzzii	Heterozygote
2016-09	Gbanikola	Outdoors	An. coluzzii	Heterozygote
2016-09	Gbanikola	Outdoors	An. gambiae	Standard
2016-08	Ouango	Indoors	An. gambiae	Unknown
2016-09	Gbanikola	Outdoors	An. gambiae	Standard
2016-09	Gbanikola	Outdoors	An. coluzzii	Heterozygote
2016-09	Gbanikola	Outdoors	An. coluzzii	Heterozygote
2016-09	Gbanikola	Outdoors	An. gambiae	Heterozygote
2016-09	Gbanikola	Outdoors	An. coluzzii	Inverted
2016-09	Gbanikola	Outdoors	An. gambiae	Heterozygote
2016-09	Gbanikola	Outdoors	An. gambiae	Standard
2016-09	Gbanikola	Outdoors	An. gambiae	Inverted
2016-09	Gbanikola	Outdoors	An. gambiae	Heterozygote
2016-09	Gbanikola	Outdoors	An. gambiae	Heterozygote
2016-09	Gbanikola	Outdoors	An. gambiae	Standard
2016-09	Gbanikola	Outdoors	An. gambiae	Standard
2016-09	Gbanikola	Outdoors	An. gambiae	Heterozygote
2016-09	Gbanikola	Outdoors	An. gambiae	Standard
2016-09	Gbanikola	Outdoors	An. coluzzii	Heterozygote
2016-09	Gbanikola	Outdoors	An. gambiae	Standard
2016-09	Gbanikola	Outdoors	An. coluzzii	Inverted
2016-09	Gbanikola	Outdoors	An. gambiae	Inverted
2016-09	Gbanikola	Outdoors	An. coluzzii	Heterozygote
2016-09	Gbanikola	Outdoors	An. coluzzii	Heterozygote
2016-09	Gbanikola	Outdoors	An. gambiae	Standard
2016-09	Gbanikola	Outdoors	An. gambiae	Standard
2016-09	Gbanikola	Outdoors	An. coluzzii	Standard
2016-09	Gbanikola	Outdoors	An. gambiae	Inverted
2016-09	Gbanikola	Outdoors	An. coluzzii	Standard
2016-09	Gbanikola	Outdoors	An. coluzzii	Heterozygote
2016-09	Gbanikola	Outdoors	An. gambiae	Standard
2016-09	Gbanikola	Outdoors	An. gambiae	Standard
2016-09	Gbanikola	Outdoors	An. gambiae	Standard
2016-09	Gbanikola	Outdoors	An. coluzzii	Heterozygote
2016-09	Gbanikola	Outdoors	An. coluzzii	Heterozygote
2016-09	Gbanikola	Outdoors	An. gambiae	Standard
2016-09	Gbanikola	Outdoors	An. gambiae	Heterozygote
2016-09	Gbanikola	Outdoors	An. gambiae	Heterozygote
2016-09	Gbanikola	Outdoors	An. coluzzii	Inverted
2016-09	Gbanikola	Outdoors	An. coluzzii	Inverted
2016-09	Gbanikola	Outdoors	An. coluzzii	Inverted
2016-09	Gbanikola	Outdoors	An. gambiae	Heterozygote
2016-09	Gbanikola	Outdoors	An. gambiae	Inverted
2016-09	Gbanikola	Outdoors	An. gambiae	Heterozygote
2016-09	Gbanikola	Outdoors	An. coluzzii	Inverted
2016-09	Gbanikola	Outdoors	An. gambiae	Standard
2016-09	Gbanikola	Outdoors	An. gambiae	Heterozygote
2016-09	Gbanikola	Outdoors	An. gambiae	Heterozygote
2016-09	Gbanikola	Outdoors	An. gambiae	Inverted
2016-09	Gbanikola	Outdoors	An. coluzzii	Inverted
2016-09	Gbanikola	Outdoors	An. gambiae	Inverted
2016-09	Gbanikola	Outdoors	An. gambiae	Inverted
2016-09	Gbanikola	Outdoors	An. coluzzii	Inverted
2016-09	Gbanikola	Outdoors	An. coluzzii	Heterozygote
2016-09	Gbanikola	Outdoors	An. coluzzii	Heterozygote
2016-08	Ouango	Indoors	An. gambiae	Inverted
2016-09	Gbanikola	Indoors	An. gambiae	Heterozygote
2016-09	Gbanikola	Indoors	An. gambiae	Standard
2016-09	Gbanikola	Indoors	An. gambiae	Heterozygote
2016-09	Gbanikola	Indoors	An. gambiae	Inverted
2016-09	Gbanikola	Indoors	An. gambiae	Inverted
2016-09	Gbanikola	Indoors	An. gambiae	Standard
2016-09	Gbanikola	Indoors	An. coluzzii	Standard
2016-09	Gbanikola	Indoors	An. coluzzii	Inverted
2016-09	Gbanikola	Indoors	An. coluzzii	Inverted
2016-09	Gbanikola	Indoors	An. coluzzii	Heterozygote
2016-09	Gbanikola	Indoors	An. coluzzii	Standard
2016-08	Ouango	Indoors	An. gambiae	Inverted
2016-08	Ouango	Indoors	An. gambiae	Heterozygote
2016-08	Ouango	Indoors	An. gambiae	Inverted
2016-08	Ouango	Indoors	An. gambiae	Inverted
2016-08	Ouango	Indoors	An. gambiae	Inverted
2016-08	Ouango	Indoors	An. gambiae	Standard
2016-08	Ouango	Indoors	An. gambiae	Unknown
2016-08	Ouango	Indoors	An. gambiae	Standard
2016-08	Ouango	Indoors	An. gambiae	Standard
2016-08	Ouango	Indoors	An. gambiae	Unknown
2016-08	Ouango	Indoors	An. gambiae	Unknown
2016-08	Ouango	Indoors	An. gambiae	Unknown
2016-09	Ile_des_Singes	Indoors	An. gambiae	Standard
2016-09	Ile_des_Singes	Indoors	An. gambiae	Inverted
2016-09	Ile_des_Singes	Indoors	An. gambiae	Standard
2016-09	Ile_des_Singes	Indoors	An. gambiae	Standard
2016-09	Ile_des_Singes	Indoors	An. gambiae	Standard
2016-09	Ile_des_Singes	Indoors	An. gambiae	Standard
2016-09	Ile_des_Singes	Indoors	An. gambiae	Standard
2016-09	Ile_des_Singes	Indoors	An. gambiae	Unknown
2016-09	Ile_des_Singes	Indoors	An. gambiae	Unknown
2016-09	Ile_des_Singes	Indoors	An. gambiae	Unknown
2016-09	Ile_des_Singes	Outdoors	An. gambiae	Standard
2016-09	Ile_des_Singes	Outdoors	An. gambiae	Standard
2016-09	Ile_des_Singes	Outdoors	An. gambiae	Standard
2016-09	Ile_des_Singes	Outdoors	An. gambiae	Standard
2016-09	Gbanikola	Outdoors	An. gambiae	Standard
2016-09	Gbanikola	Indoors	An. gambiae	Standard
2016-09	Gbanikola	Indoors	An. gambiae	Inverted
2016-09	Gbanikola	Indoors	An. gambiae	Inverted
2016-09	Gbanikola	Indoors	An. gambiae	Inverted
2016-09	Gbanikola	Indoors	An. gambiae	Inverted
2016-09	Gbanikola	Indoors	An. gambiae	Standard
2016-09	Gbanikola	Indoors	An. gambiae	Inverted
2016-09	Gbanikola	Indoors	An. gambiae	Inverted
2016-09	Gbanikola	Indoors	An. gambiae	Inverted
2016-09	Gbanikola	Indoors	An. gambiae	Inverted
2016-09	Gbanikola	Indoors	An. gambiae	Inverted
2016-09	Gbanikola	Indoors	An. coluzzii	Inverted
2016-09	Gbanikola	Indoors	An. gambiae	Standard
2016-09	Gbanikola	Indoors	An. gambiae	Inverted
2016-09	Gbanikola	Indoors	An. gambiae	Inverted
2016-09	Gbanikola	Indoors	An. coluzzii	Heterozygote
2016-09	Gbanikola	Indoors	An. gambiae	Standard
2016-09	Gbanikola	Indoors	An. gambiae	Standard
2016-09	Gbanikola	Indoors	An. coluzzii	Inverted
2016-09	Gbanikola	Indoors	An. gambiae	Standard
2016-09	Gbanikola	Indoors	An. gambiae	Inverted
2016-09	Gbanikola	Indoors	An. gambiae	Inverted
2016-09	Gbanikola	Indoors	An. gambiae	Heterozygote
2016-09	Gbanikola	Indoors	An. gambiae	Standard
2016-09	Gbanikola	Indoors	An. gambiae	Inverted
2016-09	Gbanikola	Indoors	An. gambiae	Inverted
2016-09	Gbanikola	Indoors	An. gambiae	Standard
2016-09	Gbanikola	Indoors	An. gambiae	Inverted
2016-09	Gbanikola	Indoors	An. coluzzii	Inverted
2016-09	Gbanikola	Indoors	An. coluzzii	Heterozygote
2016-09	Gbanikola	Indoors	An. gambiae	Inverted
2016-09	Gbanikola	Indoors	An. gambiae	Standard
2016-09	Gbanikola	Indoors	An. coluzzii	Standard
2016-09	Gbanikola	Indoors	An. gambiae	Standard
2016-09	Gbanikola	Indoors	An. gambiae	Heterozygote
2016-09	Gbanikola	Indoors	An. gambiae	Inverted
2016-09	Gbanikola	Indoors	An. coluzzii	Inverted
2016-09	Gbanikola	Indoors	An. gambiae	Standard
2016-09	Gbanikola	Indoors	An. coluzzii	Standard
2016-09	Gbanikola	Indoors	An. coluzzii	Standard
2016-09	Gbanikola	Indoors	An. gambiae	Standard
2016-09	Gbanikola	Indoors	An. coluzzii	Inverted
2016-09	Gbanikola	Indoors	An. coluzzii	Standard
2016-09	Gbanikola	Indoors	An. gambiae	Heterozygote
2016-09	Gbanikola	Indoors	An. gambiae	Standard
2016-09	Gbanikola	Indoors	An. gambiae	Standard
2016-09	Gbanikola	Indoors	An. coluzzii	Inverted
2016-09	Gbanikola	Indoors	An. coluzzii	Inverted
2016-09	Gbanikola	Indoors	An. gambiae	Heterozygote
2016-09	Gbanikola	Indoors	An. coluzzii	Heterozygote
2016-09	Gbanikola	Indoors	An. coluzzii	Standard
2016-09	Gbanikola	Indoors	An. gambiae	Standard
2016-09	Gbanikola	Indoors	An. gambiae	Standard
2016-09	Gbanikola	Indoors	An. gambiae	Standard
2016-09	Gbanikola	Indoors	An. gambiae	Heterozygote
2016-09	Gbanikola	Indoors	An. gambiae	Standard
2016-09	Gbanikola	Indoors	An. gambiae	Inverted
2016-09	Gbanikola	Indoors	An. coluzzii	Inverted
2016-09	Gbanikola	Indoors	An. gambiae	Standard
2016-09	Gbanikola	Indoors	An. coluzzii	Heterozygote
2016-09	Gbanikola	Indoors	An. coluzzii	Heterozygote
2016-09	Gbanikola	Indoors	An. coluzzii	Inverted
2016-09	Gbanikola	Indoors	An. coluzzii	Heterozygote
2016-09	Gbanikola	Indoors	An. gambiae	Standard
2016-09	Gbanikola	Indoors	An. gambiae	Standard
2016-09	Gbanikola	Indoors	An. coluzzii	Heterozygote
2016-09	Gbanikola	Indoors	An. gambiae	Inverted
2016-09	Gbanikola	Indoors	An. coluzzii	Inverted
2016-09	Gbanikola	Indoors	An. coluzzii	Standard
2016-09	Gbanikola	Indoors	An. gambiae	Heterozygote
2016-09	Gbanikola	Indoors	An. gambiae	Heterozygote
2016-09	Gbanikola	Indoors	An. gambiae	Inverted
2016-09	Gbanikola	Indoors	An. gambiae	Inverted
2016-09	Gbanikola	Indoors	An. coluzzii	Heterozygote
2016-09	Gbanikola	Indoors	An. coluzzii	Heterozygote
2016-09	Gbanikola	Indoors	An. coluzzii	Standard
2016-09	Gbanikola	Indoors	An. gambiae	Standard
2016-09	Gbanikola	Indoors	An. gambiae	Heterozygote
2016-09	Gbanikola	Indoors	An. coluzzii	Heterozygote
2016-09	Gbanikola	Indoors	An. gambiae	Standard
2016-09	Gbanikola	Indoors	An. gambiae	Standard
2016-09	Gbanikola	Indoors	An. coluzzii	Inverted
2016-09	Gbanikola	Indoors	An. gambiae	Inverted
2016-09	Gbanikola	Indoors	An. gambiae	Heterozygote
2016-09	Gbanikola	Indoors	An. gambiae	Inverted
2016-09	Gbanikola	Indoors	An. gambiae	Inverted
2016-09	Gbanikola	Indoors	An. gambiae	Standard
2016-09	Gbanikola	Indoors	An. gambiae	Inverted
2016-09	Gbanikola	Indoors	An. coluzzii	Heterozygote
2016-09	Gbanikola	Indoors	An. coluzzii	Inverted
2016-09	Gbanikola	Indoors	An. gambiae	Inverted
2016-09	Gbanikola	Indoors	An. gambiae	Heterozygote
2016-09	Gbanikola	Indoors	An. gambiae	Standard
2016-09	Gbanikola	Indoors	An. gambiae	Heterozygote
2016-09	Gbanikola	Indoors	An. coluzzii	Inverted
2016-09	Gbanikola	Indoors	An. gambiae	Standard
2016-09	Gbanikola	Indoors	An. gambiae	Heterozygote
2016-09	Gbanikola	Indoors	An. gambiae	Heterozygote
2016-09	Gbanikola	Indoors	An. coluzzii	Inverted
2016-09	Gbanikola	Indoors	An. gambiae	Inverted
2016-09	Gbanikola	Indoors	An. gambiae	Inverted
2016-09	Gbanikola	Indoors	An. gambiae	Standard
2016-09	Gbanikola	Indoors	An. gambiae	Standard
2016-09	Gbanikola	Indoors	An. gambiae	Standard
2016-09	Gbanikola	Indoors	An. coluzzii	Heterozygote
2016-09	Gbanikola	Indoors	An. gambiae	Standard
2016-09	Gbanikola	Indoors	An. gambiae	Heterozygote
2016-09	Gbanikola	Indoors	An. coluzzii	Inverted
2016-09	Gbanikola	Indoors	An. coluzzii	Heterozygote
2016-09	Gbanikola	Indoors	An. gambiae	Inverted
2016-09	Gbanikola	Indoors	An. coluzzii	Heterozygote
2016-09	Gbanikola	Indoors	An. gambiae	Standard
2016-09	Gbanikola	Indoors	An. gambiae	Heterozygote
2016-09	Gbanikola	Indoors	An. gambiae	Standard
2016-09	Gbanikola	Indoors	An. gambiae	Heterozygote
2016-09	Gbanikola	Indoors	An. coluzzii	Heterozygote
2016-09	Gbanikola	Indoors	An. coluzzii	Inverted
2016-09	Gbanikola	Indoors	An. gambiae	Standard
2016-09	Gbanikola	Indoors	An. coluzzii	Standard
2016-09	Gbanikola	Indoors	An. coluzzii	Heterozygote
2016-09	Gbanikola	Indoors	An. coluzzii	Standard
2016-09	Gbanikola	Indoors	An. gambiae	Standard
2016-09	Gbanikola	Indoors	An. coluzzii	Standard
2016-09	Gbanikola	Indoors	An. gambiae	Inverted
2016-09	Gbanikola	Indoors	An. gambiae	Standard
2016-09	Gbanikola	Indoors	An. gambiae	Inverted
2016-09	Gbanikola	Indoors	An. gambiae	Standard
2016-09	Gbanikola	Indoors	An. gambiae	Inverted
2016-09	Gbanikola	Indoors	An. gambiae	Inverted
2016-09	Gbanikola	Indoors	An. gambiae	Inverted
2016-09	Gbanikola	Indoors	An. gambiae	Inverted
2016-09	Gbanikola	Indoors	An. gambiae	Inverted
2016-09	Gbanikola	Indoors	An. gambiae	Standard
2016-09	Gbanikola	Indoors	An. gambiae	Inverted
2016-09	Gbanikola	Indoors	An. gambiae	Standard
2016-09	Gbanikola	Indoors	An. gambiae	Standard
2016-09	Gbanikola	Indoors	An. coluzzii	Inverted
2016-09	Gbanikola	Indoors	An. gambiae	Standard
2016-09	Gbanikola	Indoors	An. gambiae	Standard
2016-09	Gbanikola	Indoors	An. gambiae	Standard
2016-09	Gbanikola	Indoors	An. gambiae	Standard
2016-09	Gbanikola	Indoors	An. gambiae	Standard
2016-09	Gbanikola	Outdoors	An. gambiae	Standard
2016-09	Gbanikola	Outdoors	An. gambiae	Standard
2016-09	Gbanikola	Outdoors	An. gambiae	Standard
2016-09	Gbanikola	Outdoors	An. gambiae	Standard
2016-09	Gbanikola	Outdoors	An. gambiae	Standard
2016-09	Gbanikola	Outdoors	An. gambiae	Standard
2016-09	Gbanikola	Outdoors	An. gambiae	Standard
2016-09	Gbanikola	Outdoors	An. gambiae	Standard
2016-09	Gbanikola	Outdoors	An. gambiae	Standard
2016-09	Gbanikola	Outdoors	An. gambiae	Standard
2016-09	Gbanikola	Outdoors	An. gambiae	Standard
2016-09	Gbanikola	Outdoors	An. gambiae	Standard
2016-09	Gbanikola	Outdoors	An. gambiae	Standard
2016-09	Gbanikola	Outdoors	An. gambiae	Inverted
2016-09	Gbanikola	Outdoors	An. coluzzii	Standard
2016-09	Gbanikola	Outdoors	An. gambiae	Inverted
2016-09	Gbanikola	Outdoors	An. gambiae	Standard
2016-09	Gbanikola	Outdoors	An. gambiae	Standard
2016-09	Gbanikola	Outdoors	An. gambiae	Standard
2016-09	Gbanikola	Outdoors	An. gambiae	Standard
2016-09	Gbanikola	Outdoors	An. gambiae	Standard
2016-09	Gbanikola	Outdoors	An. gambiae	Standard
2016-09	Gbanikola	Outdoors	An. gambiae	Standard
2016-09	Gbanikola	Outdoors	An. gambiae	Standard
2016-09	Gbanikola	Outdoors	An. coluzzii	Inverted
2016-09	Gbanikola	Outdoors	An. gambiae	Inverted
2016-09	Gbanikola	Outdoors	An. gambiae	Inverted
2016-09	Gbanikola	Outdoors	An. gambiae	Inverted
2016-09	Gbanikola	Outdoors	An. gambiae	Inverted
2016-09	Gbanikola	Outdoors	An. gambiae	Inverted
2016-09	Gbanikola	Outdoors	An. gambiae	Standard
2016-09	Gbanikola	Outdoors	An. gambiae	Inverted
2016-09	Gbanikola	Outdoors	An. gambiae	Standard
2016-09	Gbanikola	Outdoors	An. gambiae	Heterozygote
2016-09	Gbanikola	Outdoors	An. gambiae	Standard
2016-09	Gbanikola	Outdoors	An. coluzzii	Inverted
2016-09	Gbanikola	Outdoors	An. gambiae	Heterozygote
2016-09	Gbanikola	Outdoors	An. gambiae	Standard
2016-09	Gbanikola	Outdoors	An. gambiae	Inverted
2016-09	Gbanikola	Outdoors	An. gambiae	Standard
2016-09	Gbanikola	Outdoors	An. gambiae	Inverted
2016-09	Gbanikola	Outdoors	An. gambiae	Standard
2016-09	Gbanikola	Outdoors	An. gambiae	Standard
2016-09	Ile_des_Singes	Outdoors	An. gambiae	Standard
2016-09	Ile_des_Singes	Outdoors	An. gambiae	Heterozygote
2016-09	Ile_des_Singes	Indoors	An. gambiae	Standard
2016-09	Ile_des_Singes	Indoors	An. coluzzii	Inverted
2016-09	Ile_des_Singes	Indoors	An. coluzzii	Heterozygote
2016-09	Ile_des_Singes	Indoors	An. gambiae	Heterozygote
2016-09	Ile_des_Singes	Indoors	An. gambiae	Heterozygote
2016-09	Ile_des_Singes	Indoors	An. coluzzii	Inverted
2016-09	Ile_des_Singes	Indoors	An. gambiae	Heterozygote
2016-09	Gbanikola	Indoors	An. coluzzii	Inverted
2016-09	Gbanikola	Indoors	An. gambiae	Heterozygote
2016-09	Gbanikola	Indoors	An. coluzzii	Heterozygote
2016-09	Gbanikola	Indoors	An. gambiae	Inverted
2016-09	Gbanikola	Indoors	An. gambiae	Heterozygote
2016-09	Gbanikola	Indoors	An. gambiae	Standard
2016-09	Gbanikola	Indoors	An. gambiae	Inverted
2016-09	Gbanikola	Indoors	An. gambiae	Inverted
2016-09	Gbanikola	Indoors	An. coluzzii	Inverted
2016-09	Gbanikola	Outdoors	An. gambiae	Inverted
2016-09	Gbanikola	Outdoors	An. gambiae	Standard
2016-09	Gbanikola	Indoors	An. gambiae	Heterozygote
2016-09	Ile_des_Singes	Indoors	An. gambiae	Heterozygote
2016-09	Ile_des_Singes	Indoors	An. gambiae	Standard
2016-09	Gbanikola	Outdoors	An. gambiae	Standard
2016-09	Ile_des_Singes	Indoors	An. gambiae	Standard
2016-09	Ile_des_Singes	Indoors	An. coluzzii	Standard
2016-09	Ile_des_Singes	Indoors	An. gambiae	Heterozygote
2016-09	Ile_des_Singes	Indoors	An. gambiae	Standard
2016-09	Ouango	Indoors	An. gambiae	Heterozygote
2016-09	Ouango	Indoors	An. gambiae	Standard
2016-09	Ouango	Indoors	An. gambiae	Heterozygote
2016-09	Ouango	Indoors	An. gambiae	Heterozygote
2016-09	Ouango	Indoors	An. gambiae	Standard
2016-09	Ouango	Indoors	An. coluzzii	Heterozygote
2016-09	Ouango	Indoors	An. gambiae	Heterozygote
2016-09	Ouango	Indoors	An. gambiae	Inverted
2016-09	Ouango	Indoors	An. gambiae	Standard
2016-09	Ouango	Indoors	An. gambiae	Heterozygote
2016-09	Ouango	Indoors	An. gambiae	Heterozygote
2016-09	Gbanikola	Outdoors	An. gambiae	Standard
2016-09	Ouango	Indoors	An. gambiae	Standard
2016-09	Gbanikola	Outdoors	An. gambiae	Standard
2016-09	Ouango	Indoors	An. gambiae	Heterozygote
2016-09	Ouango	Indoors	An. gambiae	Standard
2016-09	Ouango	Indoors	An. gambiae	Standard
2016-09	Ouango	Indoors	An. gambiae	Standard
2016-09	Ouango	Indoors	An. gambiae	Heterozygote
2016-09	Ouango	Indoors	An. gambiae	Standard
2016-09	Gbanikola	Outdoors	An. gambiae	Inverted
2016-09	Ouango	Indoors	An. gambiae	Inverted
2016-09	Gbanikola	Outdoors	An. gambiae	Standard
2016-09	Ouango	Outdoors	An. gambiae	Heterozygote
2016-09	Ouango	Outdoors	An. gambiae	Standard
2016-09	Ouango	Outdoors	An. gambiae	Heterozygote
2016-09	Ouango	Outdoors	An. gambiae	Standard
2016-09	Ouango	Outdoors	An. gambiae	Standard
2016-09	Ouango	Outdoors	An. gambiae	Heterozygote
2016-09	Ouango	Outdoors	An. gambiae	Heterozygote
2016-09	Ouango	Outdoors	An. coluzzii	Heterozygote
2016-09	Ouango	Outdoors	An. gambiae	Standard
2016-09	Ouango	Outdoors	An. gambiae	Standard
2016-09	Ouango	Outdoors	An. gambiae	Heterozygote
2016-09	Ouango	Outdoors	An. gambiae	Standard
2016-09	Ouango	Outdoors	An. gambiae	Heterozygote
2016-09	Ouango	Outdoors	An. gambiae	Heterozygote
2016-09	Ouango	Outdoors	An. gambiae	Standard
2016-09	Ouango	Outdoors	An. gambiae	Inverted
2016-09	Ouango	Outdoors	An. gambiae	Standard
2016-09	Ile_des_Singes	Outdoors	An. gambiae	Inverted
2016-09	Ouango	Outdoors	An. gambiae	Heterozygote
2016-09	Ouango	Outdoors	An. gambiae	Standard
2016-09	Ouango	Outdoors	An. coluzzii	Heterozygote
2016-09	Ouango	Outdoors	An. gambiae	Standard
2016-09	Ouango	Outdoors	An. gambiae	Standard
2016-09	Ouango	Outdoors	An. coluzzii	Inverted
2016-09	Ouango	Outdoors	An. gambiae	Standard
2016-09	Ouango	Outdoors	An. gambiae	Standard
2016-09	Ouango	Outdoors	An. gambiae	Heterozygote
2016-09	Ouango	Outdoors	An. gambiae	Standard
2016-09	Ouango	Outdoors	An. gambiae	Standard
2016-09	Ouango	Outdoors	An. gambiae	Inverted
2016-09	Ouango	Outdoors	An. gambiae	Standard
2016-09	Ouango	Outdoors	An. gambiae	Standard
2016-09	Ouango	Outdoors	An. gambiae	Standard
2016-09	Ouango	Outdoors	An. gambiae	Inverted
2016-09	Ouango	Outdoors	An. gambiae	Inverted
2016-09	PK10	Indoors	An. gambiae	Heterozygote
2016-09	PK10	Indoors	An. gambiae	Heterozygote
2016-09	PK10	Indoors	An. gambiae	Heterozygote
2016-09	PK10	Indoors	An. gambiae	Standard
2016-09	PK10	Indoors	An. gambiae	Heterozygote
2016-09	PK10	Indoors	An. gambiae	Heterozygote
2016-09	PK10	Indoors	An. gambiae	Inverted
2016-09	PK10	Indoors	An. gambiae	Heterozygote
2016-09	PK10	Indoors	An. gambiae	Standard
2016-09	PK10	Indoors	An. gambiae	Heterozygote
2016-09	PK10	Indoors	An. gambiae	Standard
2016-09	PK10	Indoors	An. gambiae	Inverted
2016-09	PK10	Indoors	An. gambiae	Heterozygote
2016-09	PK10	Indoors	An. gambiae	Heterozygote
2016-09	PK10	Indoors	An. coluzzii X gambiae	Standard
2016-09	PK10	Indoors	An. gambiae	Standard
2016-09	PK10	Indoors	An. gambiae	Inverted
2016-09	PK10	Indoors	An. gambiae	Inverted
2016-09	PK10	Indoors	An. gambiae	Heterozygote
2016-09	PK10	Indoors	An. gambiae	Heterozygote
2016-09	PK10	Indoors	An. gambiae	Inverted
2016-09	PK10	Indoors	An. gambiae	Inverted
2016-09	PK10	Indoors	An. gambiae	Heterozygote
2016-09	PK10	Indoors	An. gambiae	Heterozygote
2016-09	PK10	Indoors	An. gambiae	Heterozygote
2016-09	PK10	Indoors	An. gambiae	Heterozygote
2016-09	PK10	Indoors	An. gambiae	Standard
2016-09	PK10	Indoors	An. gambiae	Heterozygote
2016-09	Ile_des_Singes	Outdoors	An. gambiae	Standard
2016-09	Gbanikola	Indoors	An. gambiae	Standard
2016-09	Gbanikola	Indoors	An. coluzzii	Inverted
2016-09	Ile_des_Singes	Indoors	An. gambiae	Standard
2016-09	PK10	Indoors	An. gambiae	Standard
2016-09	PK10	Indoors	An. gambiae	Standard
2016-09	Ouango	Indoors	An. gambiae	Standard
2016-09	Ouango	Indoors	An. gambiae	Standard
2016-09	Ouango	Indoors	An. gambiae	Standard
2016-09	PK10	Indoors	An. gambiae	Heterozygote
2016-09	PK10	Indoors	An. gambiae	Heterozygote
2016-09	PK10	Indoors	An. gambiae	Standard
2016-09	PK10	Indoors	An. gambiae	Standard
2016-09	PK10	Indoors	An. gambiae	Inverted
2016-09	PK10	Indoors	An. gambiae	Heterozygote
2016-09	PK10	Indoors	An. gambiae	Heterozygote
2016-09	PK10	Indoors	An. gambiae	Standard
2016-09	PK10	Indoors	An. gambiae	Inverted
2016-09	PK10	Indoors	An. gambiae	Standard
2016-09	PK10	Indoors	An. gambiae	Inverted
2016-09	Ouango	Outdoors	An. gambiae	Standard
2016-09	Ouango	Outdoors	An. gambiae	Standard
2016-09	PK10	Outdoors	An. gambiae	Inverted
2016-09	PK10	Outdoors	An. gambiae	Heterozygote
2016-09	PK10	Outdoors	An. gambiae	Standard
2016-09	PK10	Outdoors	An. gambiae	Heterozygote
2016-09	PK10	Outdoors	An. gambiae	Inverted
2016-09	PK10	Outdoors	An. gambiae	Heterozygote
2016-09	PK10	Outdoors	An. gambiae	Inverted
2016-09	PK10	Outdoors	An. gambiae	Heterozygote
2016-09	PK10	Indoors	An. gambiae	Standard
2016-09	PK10	Outdoors	An. gambiae	Standard
2016-09	Ouango	Indoors	An. gambiae	Inverted
2016-09	Ouango	Indoors	An. gambiae	Inverted
2016-09	Ouango	Indoors	An. gambiae	Standard
2016-09	Ouango	Indoors	An. coluzzii	Heterozygote
2016-09	Ouango	Indoors	An. coluzzii	Inverted
2016-09	Ouango	Indoors	An. gambiae	Heterozygote
2016-09	Ouango	Indoors	An. gambiae	Standard
2016-09	Ouango	Indoors	An. gambiae	Heterozygote
2016-09	Ouango	Indoors	An. coluzzii	Heterozygote
2016-09	Ouango	Indoors	An. gambiae	Inverted
2016-09	Ouango	Indoors	An. gambiae	Standard
2016-09	Ouango	Indoors	An. coluzzii	Standard
2016-09	Ouango	Indoors	An. gambiae	Standard
2016-09	Ouango	Indoors	An. gambiae	Standard
2016-09	Ouango	Indoors	An. gambiae	Standard
2016-09	Ouango	Indoors	An. coluzzii	Inverted
2016-09	Ouango	Indoors	An. coluzzii	Inverted
2016-09	Ouango	Indoors	An. gambiae	Standard
2016-09	Ouango	Indoors	An. gambiae	Standard
2016-09	Ouango	Indoors	An. gambiae	Standard
2016-09	Ouango	Indoors	An. gambiae	Inverted
2016-09	Ouango	Indoors	An. gambiae	Standard
2016-09	Ouango	Indoors	An. gambiae	Standard
2016-09	Ouango	Indoors	An. gambiae	Inverted
2016-09	Ouango	Indoors	An. gambiae	Inverted
2016-09	Ouango	Indoors	An. gambiae	Heterozygote
2016-09	Ouango	Indoors	An. gambiae	Heterozygote
2016-09	PK10	Indoors	An. gambiae	Standard
2016-09	PK10	Indoors	An. gambiae	Standard
2016-09	Ouango	Indoors	An. gambiae	Standard
2016-09	PK10	Indoors	An. gambiae	Standard
2016-09	PK10	Indoors	An. gambiae	Standard
2016-09	PK10	Indoors	An. gambiae	Standard
2016-09	PK10	Indoors	An. gambiae	Standard
2016-09	PK10	Indoors	An. gambiae	Standard
2016-09	Ouango	Indoors	An. gambiae	Standard
2016-09	Ouango	Indoors	An. gambiae	Heterozygote
2016-09	Ouango	Indoors	An. gambiae	Inverted
2016-09	Ouango	Indoors	An. gambiae	Standard
2016-09	Ouango	Indoors	An. gambiae	Heterozygote
2016-09	Ouango	Indoors	An. gambiae	Standard
2016-09	Ouango	Indoors	An. gambiae	Heterozygote
2016-09	Ouango	Indoors	An. coluzzii	Standard
2016-09	Ouango	Indoors	An. gambiae	Standard
2016-09	Ouango	Indoors	An. gambiae	Inverted
2016-09	PK10	Outdoors	An. gambiae	Standard
2016-09	Ouango	Indoors	An. gambiae	Standard
2016-09	Ouango	Indoors	An. gambiae	Heterozygote
2016-09	Ouango	Indoors	An. gambiae	Standard
2016-09	Ouango	Indoors	An. gambiae	Standard
2016-09	Ouango	Indoors	An. gambiae	Standard
2016-09	Ouango	Indoors	An. gambiae	Heterozygote
2016-09	Ouango	Indoors	An. gambiae	Standard
2016-09	Ouango	Indoors	An. gambiae	Standard
2016-09	Ouango	Indoors	An. coluzzii	Heterozygote
2016-09	Ouango	Indoors	An. coluzzii	Inverted
2016-09	Ouango	Indoors	An. gambiae	Standard
2016-09	PK10	Outdoors	An. gambiae	Inverted
2016-09	Ouango	Indoors	An. gambiae	Standard
2016-09	Ouango	Indoors	An. gambiae	Standard
2016-09	Ouango	Indoors	An. gambiae	Standard
2016-09	Ouango	Indoors	An. gambiae	Standard
2016-09	Ouango	Indoors	An. gambiae	Standard
2016-09	Ouango	Indoors	An. gambiae	Heterozygote
2016-09	Ouango	Indoors	An. gambiae	Heterozygote
2016-09	Ouango	Indoors	An. gambiae	Standard
2016-09	Ouango	Indoors	An. gambiae	Standard
2016-09	Ouango	Indoors	An. gambiae	Heterozygote
2016-09	Ouango	Indoors	An. gambiae	Heterozygote
2016-09	Ouango	Indoors	An. gambiae	Inverted
2016-09	Ouango	Indoors	An. gambiae	Inverted
2016-09	Ouango	Indoors	An. gambiae	Standard
2016-09	Ouango	Indoors	An. gambiae	Heterozygote
2016-09	Ouango	Indoors	An. gambiae	Standard
2016-09	Ouango	Indoors	An. gambiae	Inverted
2016-09	Ouango	Indoors	An. gambiae	Heterozygote
2016-09	Ouango	Indoors	An. gambiae	Standard
2016-09	Ouango	Indoors	An. gambiae	Heterozygote
2016-09	Ouango	Indoors	An. gambiae	Standard
2016-09	Ouango	Indoors	An. coluzzii	Heterozygote
2016-09	Ouango	Indoors	An. gambiae	Standard
2016-09	Ouango	Indoors	An. gambiae	Heterozygote
2016-09	Ouango	Indoors	An. gambiae	Heterozygote
2016-09	Ouango	Indoors	An. gambiae	Standard
2016-09	Ouango	Indoors	An. gambiae	Standard
2016-09	Ouango	Indoors	An. gambiae	Inverted
2016-09	Ouango	Indoors	An. gambiae	Standard
2016-09	Ouango	Outdoors	An. gambiae	Heterozygote
2016-09	Ouango	Outdoors	An. coluzzii	Standard
2016-09	Ouango	Outdoors	An. gambiae	Standard
2016-09	Ouango	Outdoors	An. gambiae	Standard
2016-09	Ouango	Outdoors	An. gambiae	Heterozygote
2016-09	Ouango	Outdoors	An. gambiae	Heterozygote
2016-09	Ouango	Outdoors	An. gambiae	Standard
2016-09	Ouango	Outdoors	An. gambiae	Standard
2016-09	Ouango	Outdoors	An. gambiae	Heterozygote
2016-09	Ouango	Outdoors	An. gambiae	Heterozygote
2016-09	Ouango	Outdoors	An. gambiae	Heterozygote
2016-09	Ouango	Outdoors	An. gambiae	Inverted
2016-09	Ouango	Outdoors	An. gambiae	Inverted
2016-09	Ouango	Outdoors	An. gambiae	Standard
2016-09	Ouango	Outdoors	An. gambiae	Standard
2016-09	Ouango	Outdoors	An. gambiae	Standard
2016-09	Ouango	Outdoors	An. gambiae	Inverted
2016-09	Ouango	Outdoors	An. gambiae	Standard
2016-09	Ouango	Outdoors	An. gambiae	Heterozygote
2016-09	Ouango	Outdoors	An. gambiae	Heterozygote
2016-09	Ouango	Outdoors	An. gambiae	Standard
2016-09	Ouango	Outdoors	An. gambiae	Standard
2016-09	Ouango	Outdoors	An. gambiae	Standard
2016-09	Ouango	Outdoors	An. gambiae	Standard
2016-09	Ouango	Outdoors	An. gambiae	Inverted
2016-09	Ouango	Outdoors	An. gambiae	Standard
2016-09	Ouango	Outdoors	An. gambiae	Standard
2016-09	Ouango	Outdoors	An. gambiae	Standard
2016-09	Ouango	Outdoors	An. gambiae	Standard
2016-09	Ouango	Outdoors	An. gambiae	Standard
2016-09	Ouango	Outdoors	An. gambiae	Heterozygote
2016-09	Ouango	Outdoors	An. gambiae	Standard
2016-09	Ouango	Outdoors	An. gambiae	Standard
2016-09	Ouango	Outdoors	An. gambiae	Standard
2016-09	Ouango	Outdoors	An. gambiae	Inverted
2016-09	Ouango	Outdoors	An. coluzzii	Standard
2016-09	Ouango	Outdoors	An. gambiae	Standard
2016-09	Ouango	Outdoors	An. gambiae	Heterozygote
2016-09	Ouango	Outdoors	An. coluzzii	Inverted
2016-09	Ouango	Outdoors	An. gambiae	Inverted
2016-09	Ouango	Outdoors	An. gambiae	Inverted
2016-09	Ouango	Outdoors	An. gambiae	Inverted
2016-09	Ouango	Outdoors	An. gambiae	Inverted
2016-09	Ouango	Outdoors	An. gambiae	Standard
2016-09	Ouango	Outdoors	An. gambiae	Inverted
2016-09	Ouango	Outdoors	An. gambiae	Heterozygote
2016-09	Ouango	Outdoors	An. gambiae	Standard
2016-09	Ouango	Outdoors	An. gambiae	Heterozygote
2016-09	Ouango	Outdoors	An. gambiae	Inverted
2016-09	Ouango	Outdoors	An. gambiae	Standard
2016-09	Ouango	Outdoors	An. gambiae	Standard
2016-09	Ouango	Outdoors	An. coluzzii	Inverted
2016-09	Ouango	Outdoors	An. coluzzii	Heterozygote
2016-09	Ouango	Outdoors	An. gambiae	Standard
2016-09	Ouango	Outdoors	An. gambiae	Standard
2016-09	Ouango	Outdoors	An. gambiae	Standard
2016-09	Ouango	Outdoors	An. gambiae	Standard
2016-09	Ouango	Outdoors	An. gambiae	Inverted
2016-09	Ouango	Outdoors	An. gambiae	Heterozygote
2016-09	Ouango	Outdoors	An. gambiae	Heterozygote
2016-09	Ouango	Outdoors	An. gambiae	Heterozygote
2016-09	Ouango	Indoors	An. gambiae	Standard
2016-09	Ouango	Indoors	An. gambiae	Standard
2016-09	Ouango	Indoors	An. gambiae	Standard
2016-09	Ouango	Outdoors	An. gambiae	Standard
2016-09	Ouango	Indoors	An. gambiae	Standard
2016-09	Ouango	Indoors	An. gambiae	Standard
2016-09	Ouango	Outdoors	An. gambiae	Heterozygote
2016-09	Ouango	Outdoors	An. coluzzii	Heterozygote
2016-09	Ouango	Outdoors	An. gambiae	Inverted
2016-09	Ouango	Outdoors	An. gambiae	Inverted
2016-09	Ouango	Outdoors	An. gambiae	Standard
2016-09	Ouango	Outdoors	An. gambiae	Inverted
2016-09	Ouango	Indoors	An. gambiae	Standard
2016-09	Ouango	Indoors	An. gambiae	Standard
2016-09	Ouango	Indoors	An. gambiae	Standard
2016-09	PK10	Indoors	An. gambiae	Inverted
2016-09	PK10	Indoors	An. gambiae	Inverted
2016-09	PK10	Indoors	An. gambiae	Inverted
2016-09	PK10	Indoors	An. gambiae	Inverted
2016-09	PK10	Indoors	An. gambiae	Standard
2016-09	PK10	Indoors	An. gambiae	Inverted
2016-09	Ouango	Indoors	An. gambiae	Standard
2016-09	PK10	Indoors	An. gambiae	Inverted
2016-09	PK10	Indoors	An. gambiae	Standard
2016-09	PK10	Indoors	An. gambiae	Heterozygote
2016-09	PK10	Indoors	An. gambiae	Standard
2016-09	PK10	Indoors	An. gambiae	Heterozygote
2016-09	PK10	Indoors	An. gambiae	Heterozygote
2016-09	PK10	Indoors	An. gambiae	Heterozygote
2016-09	PK10	Indoors	An. gambiae	Standard
2016-09	PK10	Indoors	An. gambiae	Heterozygote
2016-09	PK10	Indoors	An. gambiae	Inverted
2016-09	Ouango	Outdoors	An. gambiae	Standard
2016-09	PK10	Indoors	An. gambiae	Inverted
2016-09	PK10	Indoors	An. gambiae	Standard
2016-09	PK10	Indoors	An. gambiae	Standard
2016-09	PK10	Indoors	An. gambiae	Inverted
2016-09	PK10	Indoors	An. gambiae	Heterozygote
2016-09	PK10	Indoors	An. gambiae	Heterozygote
2016-09	PK10	Indoors	An. gambiae	Heterozygote
2016-09	PK10	Indoors	An. gambiae	Inverted
2016-09	Ouango	Outdoors	An. gambiae	Standard
2016-09	Ouango	Outdoors	An. gambiae	Standard
2016-09	Ouango	Outdoors	An. gambiae	Standard
2016-09	PK10	Indoors	An. gambiae	Heterozygote
2016-09	PK10	Indoors	An. gambiae	Heterozygote
2016-09	PK10	Indoors	An. gambiae	Heterozygote
2016-09	PK10	Indoors	An. gambiae	Standard
2016-09	PK10	Outdoors	An. gambiae	Inverted
2016-09	PK10	Outdoors	An. gambiae	Inverted
2016-09	PK10	Outdoors	An. gambiae	Standard
2016-09	PK10	Outdoors	An. gambiae	Heterozygote
2016-09	PK10	Outdoors	An. gambiae	Inverted
2016-09	PK10	Outdoors	An. gambiae	Standard
2016-09	PK10	Outdoors	An. gambiae	Heterozygote
2016-09	PK10	Outdoors	An. gambiae	Standard
2016-09	Ouango	Outdoors	An. gambiae	Standard
2016-09	PK10	Outdoors	An. gambiae	Heterozygote
2016-09	Ouango	Outdoors	An. gambiae	Standard
2016-09	PK10	Outdoors	An. gambiae	Heterozygote
2016-09	Ouango	Outdoors	An. gambiae	Standard
2016-09	PK10	Indoors	An. gambiae	Heterozygote
2016-09	PK10	Indoors	An. gambiae	Standard
2016-09	PK10	Indoors	An. gambiae	Heterozygote
2016-09	PK10	Indoors	An. gambiae	Heterozygote
2016-09	PK10	Indoors	An. coluzzii	Inverted
2016-09	PK10	Indoors	An. gambiae	Standard
[truncated: 4,199 more rows]

## Sheet: Table S3
Species	Date (Year - Month)	Standard	Heterozygote	Inverted	tot	freq.2La	HWE.p.value exact test
An. coluzzii	2016-06	33	68	58	159	0.58	0.143
An. coluzzii	2016-07	20	25	19	64	0.49	0.083
An. coluzzii	2016-08	52	63	50	165	0.49	0.003
An. coluzzii	2016-09	20	43	54	117	0.65	0.042
An. coluzzii	2016-10	7	11	13	31	0.6	0.149
An. coluzzii	2016-11	6	9	10	25	0.58	0.224
An. coluzzii	2017-01	8	0	6	14	0.43	0
An. coluzzii	2017-02	9	13	13	35	0.56	0.172
An. coluzzii	2017-03	60	35	53	148	0.48	0
An. coluzzii	2017-04	48	37	33	118	0.44	0
An. coluzzii	2017-05	50	27	33	110	0.42	0
An. gambiae	2016-06	129	135	70	334	0.41	0.003
An. gambiae	2016-07	92	84	53	229	0.41	0
An. gambiae	2016-08	160	85	98	343	0.41	0
An. gambiae	2016-09	306	167	156	629	0.38	0
An. gambiae	2016-10	124	80	58	262	0.37	0
An. gambiae	2016-11	155	164	92	411	0.42	0
An. gambiae	2017-01	267	37	161	465	0.39	0
An. gambiae	2017-02	214	153	135	502	0.42	0
An. gambiae	2017-03	294	128	153	575	0.38	0
An. gambiae	2017-04	345	212	156	713	0.37	0
An. gambiae	2017-05	408	115	135	658	0.29	0

## Sheet: Table S4
Species	Date (Year - Month)	Location	Standard	Heterozygote	Inverted	tot	freq.2La	HWE.p.value
An. coluzzii	2016-07	Outdoors	13	3	9	25	0.42	0
An. coluzzii	2016-08	Indoors	34	42	30	106	0.48	0.034
An. coluzzii	2016-08	Outdoors	18	21	20	59	0.52	0.036
An. coluzzii	2016-09	Indoors	15	27	41	83	0.66	0.014
An. coluzzii	2017-03	Indoors	36	15	27	78	0.44	0
An. coluzzii	2017-03	Outdoors	24	20	26	70	0.51	0
An. coluzzii	2017-04	Indoors	25	25	20	70	0.46	0.018
An. coluzzii	2017-04	Outdoors	23	12	13	48	0.4	0.001
An. coluzzii	2017-05	Indoors	26	16	27	69	0.51	0
An. coluzzii	2017-05	Outdoors	24	11	6	41	0.28	0.047
An. gambiae	2016-06	Outdoors	55	62	37	154	0.44	0.023
An. gambiae	2016-07	Indoors	45	44	29	118	0.43	0.009
An. gambiae	2016-07	Outdoors	47	40	24	111	0.4	0.01
An. gambiae	2016-08	Indoors	114	41	70	225	0.4	0
An. gambiae	2016-08	Outdoors	46	44	28	118	0.42	0.014
An. gambiae	2016-09	Indoors	182	119	104	405	0.4	0
An. gambiae	2016-09	Outdoors	124	48	52	224	0.34	0
An. gambiae	2016-10	Indoors	87	55	41	183	0.37	0
An. gambiae	2016-10	Outdoors	37	25	17	79	0.37	0.004
An. gambiae	2016-11	Indoors	93	83	37	213	0.37	0.019
An. gambiae	2016-11	Outdoors	62	81	55	198	0.48	0.011
An. gambiae	2017-01	Indoors	172	18	123	313	0.42	0
An. gambiae	2017-01	Outdoors	95	19	38	152	0.31	0
An. gambiae	2017-02	Indoors	135	77	106	318	0.45	0
An. gambiae	2017-03	Indoors	186	68	96	350	0.37	0
An. gambiae	2017-03	Outdoors	108	60	57	225	0.39	0
An. gambiae	2017-04	Indoors	188	142	73	403	0.36	0
An. gambiae	2017-04	Outdoors	157	70	83	310	0.38	0
An. gambiae	2017-05	Indoors	270	66	82	418	0.28	0
An. gambiae	2017-05	Outdoors	138	49	53	240	0.32	0

## Sheet: Table S5
Species	Date (Year - Month)	Location	Site	Standard	Heterozygote	Inverted	tot	freq.2La	HWE.p.value
An. coluzzii	2016-06	Indoors	Gbanikola	12	24	19	55	0.56	0.417
An. coluzzii	2016-06	Indoors	Ouango	9	12	12	33	0.55	0.16
An. coluzzii	2016-06	Outdoors	Gbanikola	4	20	13	37	0.62	0.495
An. coluzzii	2016-06	Outdoors	Ouango	6	8	5	19	0.47	0.645
An. coluzzii	2016-07	Indoors	Gbanikola	2	10	4	16	0.56	0.609
An. coluzzii	2016-07	Indoors	Ile_des_Singes	3	8	2	13	0.46	0.602
An. coluzzii	2016-07	Outdoors	Gbanikola	10	2	7	19	0.42	0.001
An. coluzzii	2016-08	Indoors	Gbanikola	30	35	24	89	0.47	0.055
An. coluzzii	2016-08	Indoors	Ile_des_Singes	2	6	4	12	0.58	1
An. coluzzii	2016-08	Outdoors	Gbanikola	17	21	16	54	0.49	0.107
An. coluzzii	2016-09	Indoors	Gbanikola	12	18	27	57	0.63	0.021
An. coluzzii	2016-09	Indoors	Ouango	2	7	7	16	0.66	1
An. coluzzii	2016-09	Outdoors	Gbanikola	3	12	10	25	0.64	1
An. coluzzii	2016-10	Indoors	Gbanikola	4	5	2	11	0.41	1
An. coluzzii	2016-10	Outdoors	Gbanikola	0	4	9	13	0.85	1
An. coluzzii	2016-11	Outdoors	Gbanikola	1	6	4	11	0.64	1
An. coluzzii	2017-02	Indoors	Ile_des_Singes	1	3	7	11	0.77	0.439
An. coluzzii	2017-03	Indoors	Gbanikola	26	7	21	54	0.45	0
An. coluzzii	2017-03	Indoors	Ile_des_Singes	3	5	5	13	0.58	0.574
An. coluzzii	2017-03	Indoors	Ouango	7	3	1	11	0.23	0.439
An. coluzzii	2017-03	Outdoors	Gbanikola	9	13	12	34	0.54	0.182
An. coluzzii	2017-03	Outdoors	Ile_des_Singes	14	6	14	34	0.5	0
An. coluzzii	2017-04	Indoors	Gbanikola	11	13	3	27	0.35	1
An. coluzzii	2017-04	Indoors	Ile_des_Singes	7	7	7	21	0.5	0.187
An. coluzzii	2017-04	Indoors	Ouango	6	5	10	21	0.6	0.025
An. coluzzii	2017-04	Outdoors	Gbanikola	8	4	3	15	0.33	0.232
An. coluzzii	2017-04	Outdoors	Ile_des_Singes	6	7	7	20	0.52	0.198
An. coluzzii	2017-04	Outdoors	Ouango	9	1	3	13	0.27	0.009
An. coluzzii	2017-05	Indoors	Gbanikola	8	7	11	26	0.56	0.022
An. coluzzii	2017-05	Indoors	Ile_des_Singes	13	8	11	32	0.47	0.005
An. coluzzii	2017-05	Outdoors	Gbanikola	14	0	3	17	0.18	0.001
An. coluzzii	2017-05	Outdoors	Ile_des_Singes	5	7	1	13	0.35	1
An. coluzzii	2017-05	Outdoors	Ouango	5	4	2	11	0.36	0.538
An. gambiae	2016-06	Indoors	Gbanikola	20	14	5	39	0.31	0.448
An. gambiae	2016-06	Indoors	Ile_des_Singes	8	4	6	18	0.44	0.022
An. gambiae	2016-06	Indoors	Ouango	37	39	18	94	0.4	0.2
An. gambiae	2016-06	Indoors	PK10	9	16	4	29	0.41	0.703
An. gambiae	2016-06	Outdoors	Gbanikola	10	5	5	20	0.38	0.053
An. gambiae	2016-06	Outdoors	Ouango	35	44	22	101	0.44	0.31
An. gambiae	2016-06	Outdoors	PK10	10	12	10	32	0.5	0.168
An. gambiae	2016-07	Indoors	Gbanikola	7	10	9	26	0.54	0.256
An. gambiae	2016-07	Indoors	Ouango	25	26	16	67	0.43	0.086
An. gambiae	2016-07	Indoors	PK10	11	7	3	21	0.31	0.328
An. gambiae	2016-07	Outdoors	Gbanikola	11	6	10	27	0.48	0.006
An. gambiae	2016-07	Outdoors	Ouango	23	22	9	54	0.37	0.384
An. gambiae	2016-07	Outdoors	PK10	13	12	4	29	0.34	0.687
An. gambiae	2016-08	Indoors	Gbanikola	54	23	20	97	0.32	0
An. gambiae	2016-08	Indoors	Ile_des_Singes	15	8	9	32	0.41	0.009
An. gambiae	2016-08	Indoors	Ouango	23	5	11	39	0.35	0
An. gambiae	2016-08	Indoors	PK10	22	5	30	57	0.57	0
An. gambiae	2016-08	Outdoors	Gbanikola	21	22	15	58	0.45	0.109
An. gambiae	2016-08	Outdoors	Ile_des_Singes	7	7	0	14	0.25	0.513
An. gambiae	2016-08	Outdoors	Ouango	7	7	9	23	0.54	0.09
An. gambiae	2016-08	Outdoors	PK10	11	8	4	23	0.35	0.355
An. gambiae	2016-09	Indoors	Gbanikola	53	22	46	121	0.47	0
An. gambiae	2016-09	Indoors	Ile_des_Singes	12	5	3	20	0.28	0.107
An. gambiae	2016-09	Indoors	Ouango	65	37	22	124	0.33	0
An. gambiae	2016-09	Indoors	PK10	52	55	33	140	0.43	0.025
An. gambiae	2016-09	Outdoors	Gbanikola	51	14	23	88	0.34	0
An. gambiae	2016-09	Outdoors	Ouango	59	25	19	103	0.31	0
An. gambiae	2016-09	Outdoors	PK10	8	8	7	23	0.48	0.207
An. gambiae	2016-10	Indoors	Gbanikola	14	8	7	29	0.38	0.043
An. gambiae	2016-10	Indoors	Ouango	28	14	10	52	0.33	0.009
An. gambiae	2016-10	Indoors	PK10	41	30	23	94	0.4	0.001
An. gambiae	2016-10	Outdoors	Gbanikola	5	10	12	27	0.63	0.405
An. gambiae	2016-10	Outdoors	Ouango	24	10	2	36	0.19	0.588
An. gambiae	2016-10	Outdoors	PK10	8	3	0	11	0.14	1
An. gambiae	2016-11	Indoors	Gbanikola	11	21	5	37	0.42	0.499
An. gambiae	2016-11	Indoors	Ile_des_Singes	17	11	3	31	0.27	0.65
An. gambiae	2016-11	Indoors	Ouango	17	13	5	35	0.33	0.441
An. gambiae	2016-11	Indoors	PK10	48	38	24	110	0.39	0.005
An. gambiae	2016-11	Outdoors	Gbanikola	13	17	10	40	0.46	0.355
An. gambiae	2016-11	Outdoors	Ouango	8	4	3	15	0.33	0.232
An. gambiae	2016-11	Outdoors	PK10	40	58	39	137	0.5	0.087
An. gambiae	2017-01	Indoors	Ile_des_Singes	21	4	11	36	0.36	0
An. gambiae	2017-01	Indoors	Ouango	116	10	67	193	0.37	0
An. gambiae	2017-01	Indoors	PK10	33	3	41	77	0.55	0
An. gambiae	2017-01	Outdoors	Ile_des_Singes	4	2	5	11	0.55	0.061
An. gambiae	2017-01	Outdoors	Ouango	69	16	25	110	0.3	0
An. gambiae	2017-01	Outdoors	PK10	18	1	7	26	0.29	0
An. gambiae	2017-02	Indoors	Gbanikola	5	5	6	16	0.53	0.153
An. gambiae	2017-02	Indoors	Ile_des_Singes	43	14	14	71	0.3	0
An. gambiae	2017-02	Indoors	Ouango	81	56	82	219	0.5	0
An. gambiae	2017-02	Indoors	PK10	6	2	4	12	0.42	0.029
An. gambiae	2017-02	Outdoors	Ile_des_Singes	10	4	3	17	0.29	0.089
An. gambiae	2017-02	Outdoors	Ouango	60	57	22	139	0.36	0.199
An. gambiae	2017-02	Outdoors	PK10	7	14	3	24	0.42	0.432
An. gambiae	2017-03	Indoors	Gbanikola	63	30	48	141	0.45	0
An. gambiae	2017-03	Indoors	Ile_des_Singes	43	10	19	72	0.33	0
An. gambiae	2017-03	Indoors	Ouango	54	15	16	85	0.28	0
An. gambiae	2017-03	Indoors	PK10	26	13	13	52	0.38	0.001
An. gambiae	2017-03	Outdoors	Gbanikola	16	25	18	59	0.52	0.296
An. gambiae	2017-03	Outdoors	Ile_des_Singes	35	21	24	80	0.43	0
An. gambiae	2017-03	Outdoors	Ouango	52	12	15	79	0.27	0
An. gambiae	2017-04	Indoors	Gbanikola	20	20	7	47	0.36	0.545
An. gambiae	2017-04	Indoors	Ile_des_Singes	39	23	10	72	0.3	0.049
An. gambiae	2017-04	Indoors	Ouango	105	80	45	230	0.37	0
An. gambiae	2017-04	Indoors	PK10	24	19	11	54	0.38	0.081
An. gambiae	2017-04	Outdoors	Gbanikola	26	14	9	49	0.33	0.02
An. gambiae	2017-04	Outdoors	Ile_des_Singes	22	7	27	56	0.54	0
An. gambiae	2017-04	Outdoors	Ouango	96	45	40	181	0.35	0
An. gambiae	2017-04	Outdoors	PK10	13	4	7	24	0.38	0.002
An. gambiae	2017-05	Indoors	Gbanikola	33	12	7	52	0.25	0.008
An. gambiae	2017-05	Indoors	Ile_des_Singes	63	6	7	76	0.13	0
An. gambiae	2017-05	Indoors	Ouango	147	34	53	234	0.3	0
An. gambiae	2017-05	Indoors	PK10	27	14	15	56	0.39	0.001
An. gambiae	2017-05	Outdoors	Gbanikola	21	2	10	33	0.33	0
An. gambiae	2017-05	Outdoors	Ile_des_Singes	34	16	1	51	0.18	1
An. gambiae	2017-05	Outdoors	Ouango	66	25	32	123	0.36	0
An. gambiae	2017-05	Outdoors	PK10	17	6	10	33	0.39	0.001

## Sheet: Table S6
	Models	(Intercept)	Humidity	Precipitations	Atmospheric pressure	Temperature	Temperature mini	Temperature Maxi	df	logLik	AICc	delta	weight
An. gambiae	1	-0.459153	NA	NA	NA	NA	NA	NA	1	-5.38664	13.2177	0	0.23611
An. gambiae standard	1	-0.106621	NA	NA	NA	NA	NA	NA	1	-7.37369	17.1918	0	0.206534
An. gambiae heterozygote	1	-0.94999	NA	NA	NA	NA	NA	NA	1	-3.59655	9.63755	0	0.23776
An. gambiae inverted	1	-1.11068	NA	NA	NA	NA	NA	NA	1	-3.13145	8.70735	0	0.236429
An. coluzzii	1	0.0756907	NA	NA	NA	NA	NA	NA	1	-7.67034	17.7851	0	0.21182
An. coluzzii standard	1	-0.734102	NA	NA	NA	NA	NA	NA	1	-5.04609	12.5366	0	0.202803
An. coluzzii heterozygote	1	-0.783425	NA	NA	NA	NA	NA	NA	1	-4.13896	10.7224	0	0.242328
An. coluzzii inverted	1	-0.566164	NA	NA	NA	NA	NA	NA	1	-4.9457	12.3358	0	0.237199
